# Simulation-based inference for efficient identification of generative models in computational connectomics

Jan Boelts<sup>1,2</sup>✉, Philipp Harth<sup>3</sup>, Richard Gao<sup>1,2</sup>, Daniel Udvary<sup>4</sup>, Felipe Yáñez<sup>4</sup>, Daniel Baum<sup>3</sup>, Hans-Christian Hege<sup>3</sup>, Marcel Oberlaender<sup>4</sup>, Jakob H. Macke<sup>1,2,5</sup>

<sup>1</sup>Machine Learning in Science, University of Tübingen; <sup>2</sup>Tübingen AI Center, University of Tübingen; <sup>3</sup>Department of Visual and Data-centric Computing, Zuse Institute Berlin; <sup>4</sup>In Silico Brain Sciences, Max Planck Institute for Neurobiology of Behavior – caesar, Bonn; <sup>5</sup>Empirical Inference, Max Planck Institute for Intelligent Systems, Tübingen

✉ For correspondence:  
jan.boelts@uni-tuebingen.de  
(JB)

**Code availability:** Source code for reproducing the presented results is available at [GitHub](#).

**Competing interests:** The authors declare no competing interests.

## Abstract

Recent advances in connectomics research enable the acquisition of increasing amounts of data about the connectivity patterns of neurons. How can we use this wealth of data to efficiently derive and test hypotheses about the principles underlying these patterns? A common approach is to simulate neural networks using a hypothesized wiring rule in a generative model and to compare the resulting synthetic data with empirical data. However, most wiring rules have at least some free parameters, and identifying parameters that reproduce empirical data can be challenging as it often requires manual parameter tuning. Here, we propose to use simulation-based Bayesian inference (SBI) to address this challenge. Rather than optimizing a single rule to fit the empirical data, SBI considers many parametrizations of a wiring rule and performs Bayesian inference to identify the parameters that are compatible with the data. It uses simulated data from multiple candidate wiring rules and relies on machine learning methods to estimate a probability distribution (the ‘posterior distribution over rule parameters conditioned on the data’) that characterizes all data-compatible rules. We demonstrate how to apply SBI in connectomics by inferring the parameters of wiring rules in an *in silico* model of the rat barrel cortex, given *in vivo* connectivity measurements. SBI identifies a wide range of wiring rule parameters that reproduce the measurements. We show how access to the posterior distribution over all data-compatible parameters allows us to analyze their relationship, revealing biologically plausible parameter interactions and enabling experimentally testable predictions. We further show how SBI can be applied to wiring rules at different spatial scales to quantitatively rule out invalid wiring hypotheses. Our approach is applicable to a wide range of generative models used in connectomics, providing a quantitative and efficient way to constrain model parameters with empirical connectivity data.

## Author summary

The brain is composed of an intricately connected network of cells—what are the factors that contribute to constructing these patterns of connectivity, and how? To answer these questions, amassing connectivity data alone is not enough. We must also be able to efficiently develop and test our ideas about the underlying connectivity principles. For example, we could simulate a hypothetical wiring rule like “neurons near each other are more likely to form connections” in a computational model and generate corresponding synthetic data. If the synthetic, simulated data resembles the real, measured data, then we have some confidence that our hypotheses might be correct. The challenge, however, lies in finding all the potential wiring rules, or equivalently, all the parameters of the computational model that can reproduce the observed data, as this process is often idiosyncratic and labor-intensive. To tackle this challenge, we introduce an approach that combines computational modeling in connectomics, deep learning, and Bayesian statistical inference in order to automatically infer a probability distribution over the model parameters likely to explain the data. We demonstrate our approach by inferring wiring rules in a detailed model of the rat barrel cortex and find that the inferred distribution identifies multiple data-compatible model parameters, reveals biologically plausible parameter interactions, and allows us to make experimentally testable predictions.

## Introduction

Connectomics investigates the structural and functional composition of neural networks to distill principles of the connectivity patterns underlying brain function (*Chklovskii et al., 2004; Sporns et al., 2005*). Over the last years, advances in imaging and tracing techniques enabled the acquisition of increasingly detailed connectivity data (*Osten and Margrie, 2013; Kornfeld and Denk, 2018; Macrina et al., 2021*) and led to significant insights (*Motta et al., 2019; Valdes-Aleman et al., 2021; Loomba et al., 2022*). These advances in data acquisition necessitate new computational tools for analyzing the data and testing hypotheses derived from it (*Jain et al., 2010; Sporns and Bassett, 2018; Peyser et al., 2019*). A recent computational approach for testing hypotheses in connectomics has been to use so-called *generative models* (*Betz et al., 2017; Váša and Mišić, 2022; Luppi et al., 2022*). The idea of generative modeling is to develop a computational model capable of generating synthetic connectivity data according to a specific hypothesis, e.g., a wiring rule (Fig. 1a, left). Subsequently, one can validate and refine the wiring rule (or the underlying computational model) by comparing the simulated with measured connectivity data (Fig. 1a, right). Examples for this approach range from large-scale generative models of functional connectivity in the human cortex (*Vértes et al., 2012; Betz et al., 2016*), system-level network models of the mouse visual cortex (*Billeh et al., 2020*), and generative models of cortical microcircuits (*Reimann et al., 2015*).

As a specific example, we here consider a generative model for simulating hypothesized wiring rules in the rat barrel cortex (*Udvarý et al., 2022*). The model is based on reconstructions of axon and dendrite morphologies from *in vivo* recordings (*Narayanan et al., 2015*) and reconstructions of the barrel cortex geometry, cytoarchitecture, and cellular organization (*Meyer et al., 2010, 2013*). These anatomical features were combined into a 3D model to obtain a quantitative and realistic estimate of the dense neuropil structure for a large volume of the rat barrel cortex (*Egger et al., 2014; Udvarý et al., 2022*). Thus, by applying a hypothesized wiring rule to the structural features of the model, one can generate a corresponding synthetic barrel cortex connectome and compare it to empirical data to test the validity of the wiring rule. For example, *Udvarý et al. (2022)* used the barrel cortex model to show that a wiring rule that only takes into account neuron morphology predicts connectivity patterns that are consistent with those observed empirically in the barrel cortex.

However, building generative models that accurately reproduce connectivity measurements can be challenging: Suppose a hypothesized wiring rule does not reproduce the data. In that case, a common approach would be manually refining the rule, e.g., by introducing parameters and

## a Conventional generative modeling

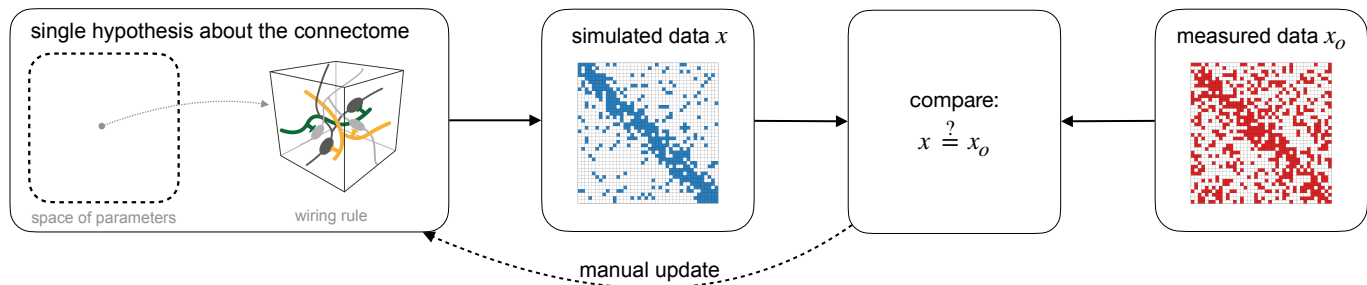

## b Automated model identification with SBI

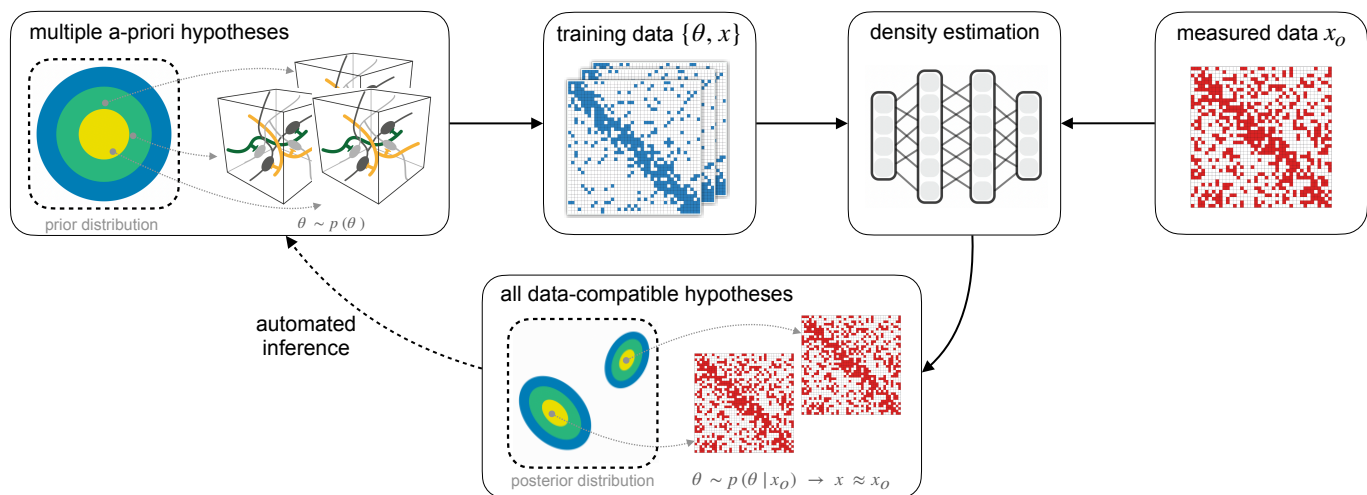

**Figure 1. Enhancing generative modeling in connectomics with simulation-based inference.** (a) Generative modeling is a common approach for testing hypotheses about the connectome: One implements a hypothesized wiring rule as a computational model that simulates connectivity data  $x$  (left) and then tests and manually refines the rule by comparing simulated with measured data  $x_o$  (right). (b) Our goal is to make this approach more efficient using simulation-based Bayesian inference (SBI): By equipping the generative model with parameters  $\theta$ , we define a space of multiple *a-priori* hypotheses (left) from which we can generate multiple simulated data  $x$  (middle). We then use the simulated data to perform density estimation with artificial neural networks to estimate the *posterior distribution* over model parameters conditioned on the measured data, i.e.,  $p(\theta|x_o)$ . The inferred posterior distribution characterizes *all* wiring rule parameters compatible with the measured data, replacing the manual refinement of single wiring rules in the conventional approach (bottom).

repeating the simulate-and-compare-to-measurements loop (Fig. 1a), which can be laborious and inefficient. Additionally, identifying one specific wiring rule configuration for which simulated and empirical data match might not be enough: Given that the available empirical connectivity data is sparse compared to the structural and functional complexity of the connectome, it is likely that there are many data-compatible wiring rules and we would need to repeat the search to identify them all.

To address these challenges, we propose a new approach that employs Bayesian inference to replace the manual comparison of individual wiring rules (Fig. 1a) with the automated inference of multiple wiring rules (Fig. 1b). We achieve this by taking two conceptual steps: First, we equip the generative model with parameters  $\theta$  and interpret different parameter combinations as variants of the underlying hypothesis, e.g., variants of the wiring rule. Second, we define a probability distribution over the model parameters such that each parameter configuration corresponds to a different candidate wiring rule, i.e., a *prior distribution*  $p(\theta)$  (Fig. 1b, left), and use Bayesian inference to infer all data-compatible parameters. Given measured connectivity data  $x_o$  and a parametrized generative model, we infer the conditional probability distribution over the model parameters given the

measured data, i.e., the *posterior distribution*  $p(\theta|x_o)$ . The posterior distribution characterizes all parameter configurations (wiring rules) likely to explain the measured data, in contrast to conventional approaches that often optimize for one best-fitting parameter. For example, by sampling different parameters from the inferred posterior we would obtain different wiring rule configurations all of which are likely to generate data similar to the measured data (Fig. 1b, bottom). Additionally, the posterior distribution also allows us to quantify the correlations between the parameters, which can help to reveal parameter interactions and potential compensation mechanisms in the model.

On a technical level, standard Bayesian inference methods usually require access to the likelihood function of the model. However, generative models employed in computational connectomics are often defined as computer simulations for which the likelihood may not be easily accessible. Therefore, we propose using simulation-based inference (SBI, *Cranmer et al., 2020; Gonçalves et al., 2020; Papamakarios and Murray, 2016; Lueckmann et al., 2017; Greenberg et al., 2019*). SBI enables Bayesian inference using only simulated data from the model, i.e., without requiring access to the likelihood. In particular, SBI performs conditional density estimation with artificial neural networks: It uses data simulated from the model to train an artificial neural network that takes data as input and predicts an approximation to the posterior distribution. Once trained on simulated data, the neural network can be applied to the measured data to obtain the desired posterior distribution  $p(\theta|x_o)$  (Fig. 1b, right).

We demonstrate our approach using the example of constraining wiring rules in the structural model of the rat barrel cortex introduced above. First, we show how to reformulate wiring rules as parametrized models to make them amenable to Bayesian inference. The resulting generative model consists of the parametrized wiring rule applied to the structural model to generate a simulated connectome of the rat barrel cortex. Second, we show that SBI can identify all parameter configurations that agree with measured connectivity data. When testing our approach in a scenario with simulated data and a known reference solution, we find that SBI performs accurately. In the realistic setting with measured connectivity data, SBI identifies a large set of rule configurations that reproduce observed and predict unobserved features of the connectome. Importantly, analyzing the inferred posterior reveals that this set of plausible rules is highly structured and reflects biologically interpretable interactions of the parameters. Finally, we illustrate the flexibility of the SBI approach by inferring two proximity-based wiring rules at different spatial scales to quantitatively show that Peters' rule cannot explain connectivity measurements in the barrel cortex.

Our approach provides a new quantitative and efficient tool for constraining model parameters with connectivity measurements and is applicable to many generative models used in connectomics. For example, it sets the stage for building generative models based on dense reconstructions of brain tissue (e.g., *MICrONS-Consortium et al., 2021; Shapson-Coe et al., 2021; Turner et al., 2022*) and inferring underlying connectivity principles using SBI. We are making all software tools required for applying SBI available in an open-source software package (*sbi, Tejero-Cantero et al., 2020*), facilitating its use by researchers across the field.

## Results

### Formulating wiring rules in the rat barrel cortex as simulation-based models

To demonstrate the potential of simulation-based inference (SBI) for connectomics, we selected the problem of constraining wiring rules in the rat barrel cortex with empirical connectivity data. Applying SBI requires three ingredients: a simulation-based model with free parameters, a prior distribution over the parameters, and measured data (see *Methods & Materials* for details). Our analyses are based on a digital model of the dense neuropil structure of the rat barrel cortex (*Egger et al., 2014; Udvardy et al., 2022*), which we extended to obtain a simulation-based model. The model contains reconstructions of the number and distribution of somata, axon and dendrite morphologies, and subcellular features like pre-synaptic boutons and post-synaptic dendritic spines.



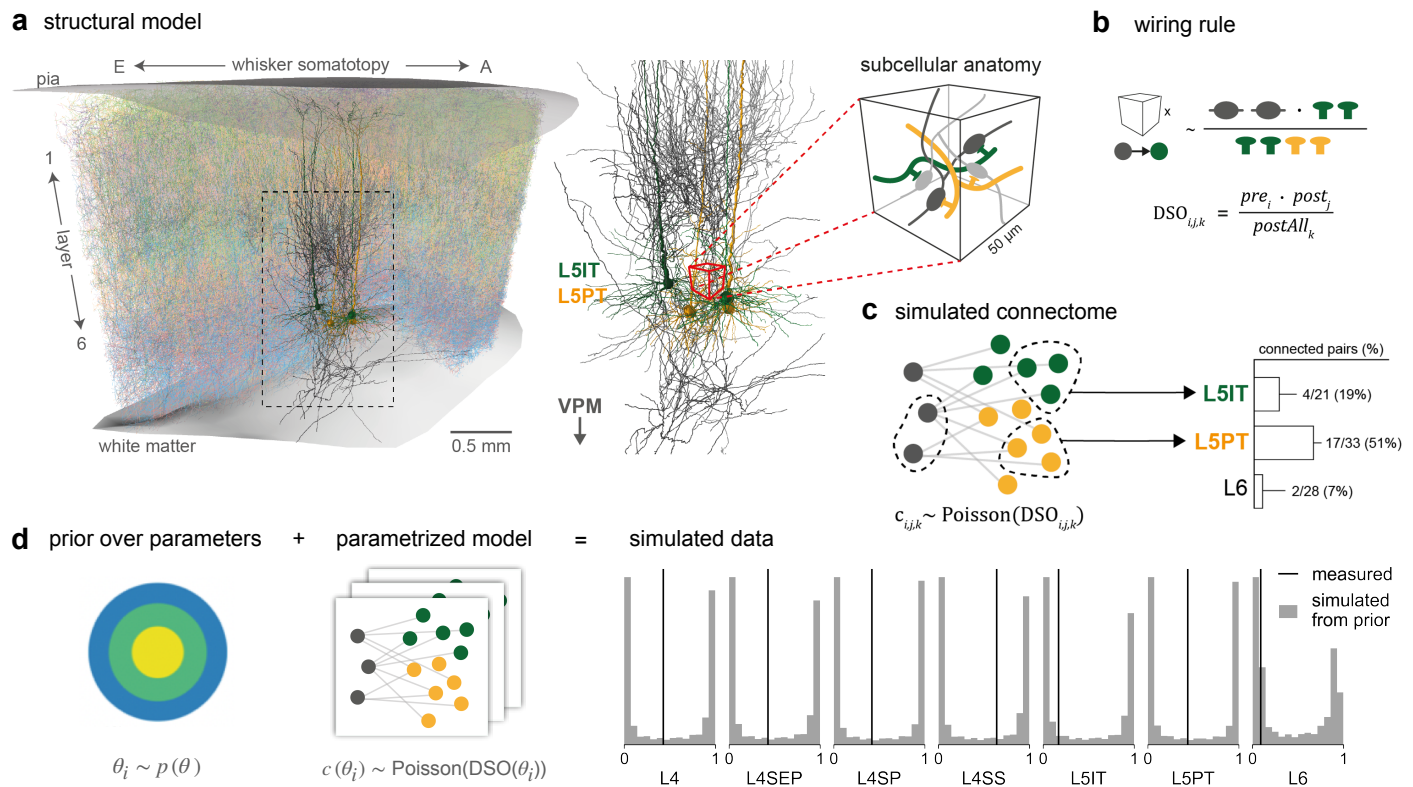

**Figure 2. Formulating wiring rules in the rat barrel cortex as simulation-based models.** (a) The structural model of the rat barrel cortex contains digital reconstructions of position, morphology, and subcellular features of several neuron types in the barrel cortex and the ventral posterior medial nucleus (VPM) of the thalamus. (b) We formulate a wiring rule that predicts the probability of a synapse between two neurons from their *dense structural overlap* (DSO), i.e., the product of the number of *pre*- and *postsynaptic* structural features, normalized by all postsynaptic features in a given subvolume (*postAll*). (c) By applying the wiring rule to every neuron-pair subvolume combination of the model to connection probabilities and then sampling corresponding synapse counts from a Poisson distribution (left), we can simulate a barrel cortex connectome. To compare the simulated data to measurements, we calculate population connection probabilities between VPM and barrel cortex cell types as they have been measured experimentally (right). (d) To obtain a simulation-based model, we introduce parameters to the rule and define a prior distribution over parameters (left) such that each parameter combination corresponds to a different rule. Simulating data with random parameters from the prior covers the entire range of probabilities (right, gray), including the measured data (black, [Bruno and Sakmann, 2006](#); [Constantinople and Bruno, 2013](#)).

These anatomical features were collected for several neuron types in the barrel cortex and projecting neurons from the ventral posterior medial nucleus (VPM) of the thalamus and arranged in 3D model (Fig. 2a, see [Methods & Materials](#) for details). Thus, by applying a wiring rule that predicts the connectivity of each neuron pair in the model from the structural features, one can construct a simulated connectome of the entire barrel cortex ([Egger et al., 2014](#)). [Udvary et al. \(2022\)](#) proposed a parameter-free wiring rule acting solely on structural features of the model, e.g., the pre-synaptic boutons and postsynaptic dendritic spines. Here, we extended this wiring rule to a parameterized version that allows systematic analysis of how such structural features could interact and be predictive of connectivity.

#### A wiring rule for the rat barrel cortex

The parameter-free wiring rule introduced by [Udvary et al. \(2022\)](#) proposes that the probability of two neurons forming a synapse is proportional to a quantity called *dense structural overlap* (DSO). The DSO is defined as the product of the number of presynaptic boutons and postsynaptic contact sites (e.g., dendritic spines), normalized by the number of all postsynaptic targets in the neighborhood (denoted as  $pre_i$ ,  $post_j$  and  $postAll_k$  for each neuron  $i$ , neuron  $j$  and subvolume  $k$  in the model, Fig. 2b):

$$DSO_{i,j,k} = \frac{pre_i \cdot post_j}{postAll_k}. \quad (1)$$

To simulate a connectome corresponding to the DSO wiring rule, one applies the rule to every subvolume-neuron-pair combination of the structural model and then samples synapse counts from a Poisson distribution using the calculated synapse probabilities (Fig. 2c, left, see Methods & Materials for details). The resulting simulated connectome can then be used to calculate summary statistics in the format recorded in experiments, e.g., *in vitro* or *in vivo* paired recordings or dense reconstructions at electron microscopic levels (Fig. 2c, right).

**Udvarý et al. (2022)** showed that the DSO wiring rule can reproduce measured network characteristics at different scales. However, in its current form, the DSO rule assumes that the pre- and postsynaptic features have the same relative weight in determining the probability of a synapse and that these weights are the same across all barrel cortex cell types. Is this specific combination of pre- and postsynaptic features in the DSO rule the only valid choice? A common approach to testing this question would be to iteratively modify the rule, e.g., by adding a scaling factor to the postsynaptic features or introducing different scaling factors for every cell type. However, this approach can be inefficient because any changes to the rule would require rerunning the procedure of generating simulated data and manually comparing it to measured data.

### Defining a wiring rule simulator

In order to test different variations of the DSO rule efficiently, we introduced three parameters to the DSO rule:  $\theta_{pre}$  for scaling the presynaptic bouton counts,  $\theta_{post}$  for scaling the postsynaptic target density, and  $\theta_{postAll}$  for scaling the normalizing feature (Fig. 2d, left). The parametrized DSO rule for a presynaptic neuron  $i$  and postsynaptic neuron  $j$  positioned in a subvolume  $k$  is then given by

$$DSO_{i,j,k}(\theta) = \frac{pre_i^{\theta_{pre}} \cdot post_j^{\theta_{post}}}{postAll_k^{\theta_{postAll}}}, \quad (2)$$

(see Methods & Materials for details). The three parameters represent the relative weight with which each local subcellular feature contributes to forming connections.

The next step towards applying SBI is selecting measured data  $x_o$  to constrain the rule parameters. We selected seven connection probabilities of neuronal populations mapping from the ventral posterior medial nucleus (VPM) of the thalamus to different layers and cell types in the barrel cortex, as proposed by **Udvarý et al. (2022)**: layer four (L4), layer four septum (L4SEP), layer four star-pyramidal cells (L4SP), and layer four spiny stellate cells (L4SS) (**Bruno and Sakmann, 2006**), layer five slender-tufted intratelencephalic cells (L5IT), layer five thick-tufted pyramidal tract cells (L5PT), and layer six (**Constantinople and Bruno, 2013**).

Overall, one simulation of the wiring rule consisted of three steps: First, applying the rule with a given set of parameters to the structural features of every combination of neuron-pair-subvolume to obtain connection probabilities; second, sampling synapses from the Poisson distribution given the probabilities; and third, calculating the summary statistics matching the measured VPM-barrel cortex population connection probabilities (Fig. 2a-d; see Methods & Materials for details). As prior over the parameters  $p(\theta)$ , we selected a Gaussian distribution such that sampling random parameter values from the prior resulted in simulated population connection probabilities that covered a broad range of possible values, including the measured values (Fig. 2d, right). This set of sampled model parameter values and their corresponding simulated connection probabilities constituted the training dataset for running SBI.

### SBI performs accurately on simulated data

Before applying SBI to infer the parameters of the DSO rule given measured data, we validated its accuracy. As a first step, we considered a variant of the DSO rule simulator for which it was possible to obtain a ground-truth reference posterior distribution (see section Methods & Materials for

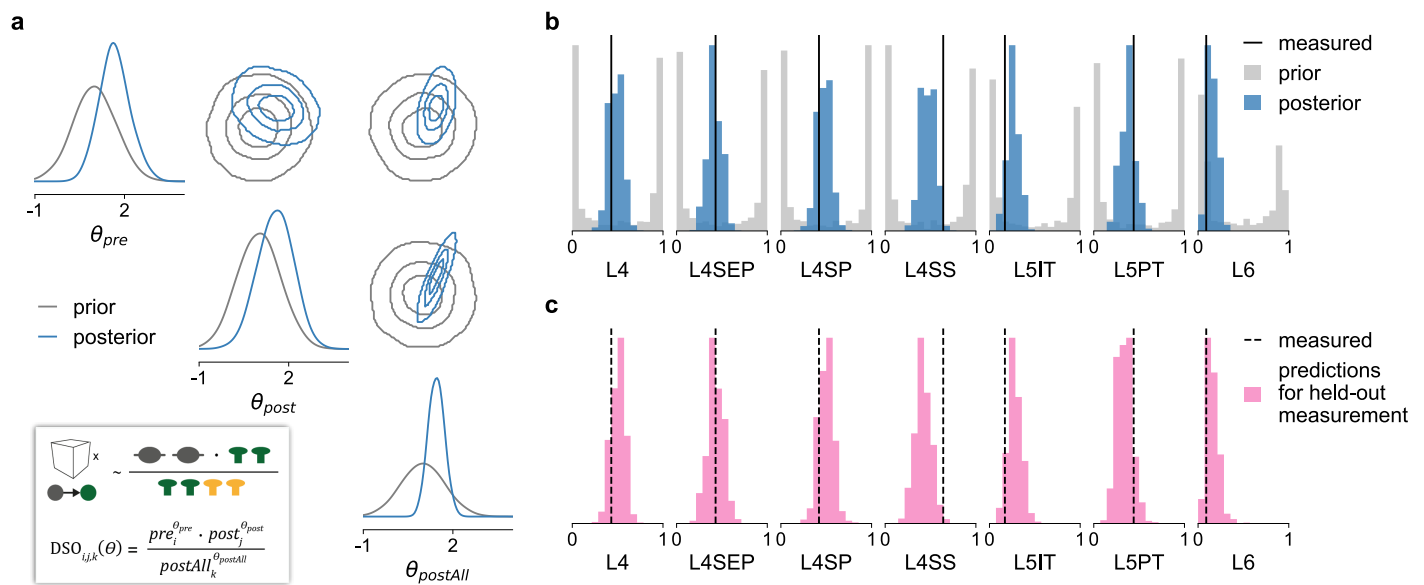

**Figure 3. SBI posterior reveals parameter interactions and predicts unseen data.** (a) The posterior over the three wiring rule parameters scaling the DSO features (see inset) inferred with SBI (blue) and the initial prior distribution over parameters (gray). The corner plot shows the one-dimensional marginal distribution of each parameter on the diagonal and the pairwise two-dimensional marginals on the off-diagonal (contour lines show the 34%, 68% and 95% credible regions). (b) Comparison of measured connection probabilities (black, *Bruno and Sakmann, 2006; Constantinople and Bruno, 2013*) with those simulated with parameter values sampled from the inferred posterior (blue) versus from the prior (gray). (c) Each panel shows the predictions for one held-out measurement generated from a posterior that was trained and conditioned only on the other six measurements, i.e., each panel refers to a different posterior.

209 details). Using this reference solution, we checked whether SBI infers the posterior accurately and  
 210 how many training simulations it requires. We compared three SBI algorithms: Sequential Neural  
 211 Posterior Estimation (SNPE, *Papamakarios and Murray, 2016; Lueckmann et al., 2017; Greenberg*  
 212 *et al., 2019*), which performs SBI sequentially over multiple rounds focusing inference on one par-  
 213 ticular observation; its non-sequential variant NPE; and a classical rejection-sampling-based ap-  
 214 proach called Sequential Monte Carlo (SMC, *Sisson et al., 2007; Beaumont et al., 2009*). We found  
 215 that all three methods can accurately infer the reference posterior distribution (Suppl. Fig. S1a,b)  
 216 but that they differ in terms of simulation efficiency: SNPE was slightly more efficient than NPE,  
 217 and both were substantially more efficient than SMC (Suppl. Fig. S1b). As a second step, we per-  
 218 formed two checks to validate SBI on the realistic version of the simulator for which no reference  
 219 solution was available. First, we used simulated-based calibration (SBC, *Talts et al., 2020*) to check  
 220 whether the variances of posterior distributions inferred with SBI were well-calibrated, i.e., neither  
 221 too narrow (overconfident) nor too wide (conservative). We found that SNPE and NPE run with *sim-*  
 222 *ulated* observed data inferred well-calibrated posteriors for all three parameters (Suppl. Fig. S1c).  
 223 Second, we checked the predictive performance of SBI by generating simulated data using param-  
 224 eter values sampled from the inferred posterior. We found that the predicted data resembles the  
 225 (simulated) observed data (Suppl. Fig. S1d, see Methods & Materials for details).

## 226 SBI identifies many possible wiring rules and reveals parameter interactions

227 After evaluating SBI with simulated data, we applied it to infer the posterior over DSO rule param-  
 228 eters given the seven measured VPM-barrel cortex connection probabilities (*Bruno and Sakmann,*  
 229 *2006; Constantinople and Bruno, 2013*). Our analysis of the inferred posterior distribution revealed  
 230 three key insights.

The posterior identifies many data-compatible wiring rule configurations. We found that the inferred posterior distribution was relatively broad, suggesting many parameter combinations with a high probability of explaining the measured data (Fig. 3a): The one-dimensional posterior marginal distributions of the three parameters (Fig. 3a, blue in diagonal subplots) showed maxima at parameter values of  $\theta_{pre} = 1.57$ ,  $\theta_{post} = 1.51$  and  $\theta_{postAll} = 1.38$ , and marginal variances of  $\hat{\sigma}_{pre}^2 = 0.26$ ,  $\hat{\sigma}_{post}^2 = 0.35$  and  $\hat{\sigma}_{postAll}^2 = 0.07$ . These values indicated that  $\theta = [1.57, 1.51, 1.38]$  was the most likely weighting of the DSO rule features (see Fig. 3a, inset) but that there are also several other parameter combinations with a high posterior probability. For example, sampling parameter values from the posterior for  $\theta_{post}$  would return values lying mostly in an interval as broad as [0.33, 2.69] (95% posterior credible interval). Despite this relatively broad range of plausible parameters values, we still found that simulating these parameters with the DSO rule resulted in connection probabilities close to the measured data and substantially different from those simulated with the prior (Fig. 3b, blue versus gray). How can so many parameter configurations from such broad ranges all result in similar data?

Posterior analysis reveals biologically plausible parameter interactions. Having access to the full posterior distribution and its covariance structure allowed us to answer this question. Inspection of the two-dimensional marginals of each parameter pair indicated a correlation structure substantially different from the uncorrelated prior distribution (Fig. 3a, off-diagonal subplots). To quantify this, we estimated the Pearson correlation coefficients of 10,000 parameter values sampled from the posterior distribution. We found a negative correlation between  $\theta_{pre}$  and  $\theta_{post}$  (Pearson correlation coefficient  $\rho = -0.23$ ) and positive correlations between  $\theta_{postAll}$  and  $\theta_{pre}$  as well as  $\theta_{post}$  ( $\rho = 0.35$  and  $\rho = 0.81$ , respectively). These correlations are plausible given the design of the DSO rule (see equation 2). For example, the negative correlation between  $\theta_{pre}$  and  $\theta_{post}$  indicated that when increasing the value of  $\theta_{pre}$ , we would have to decrease  $\theta_{post}$  in order to obtain the same overall number of connections for a particular cell type. This suggests that a stronger influence of presynaptic boutons on the connection probability requires a weaker influence of postsynaptic target targets on the connection probability.

The correlations further suggested that all three structural features are relevant in predicting the connection probabilities: Once one parameter is fixed, the values of the other parameters are strongly constrained. Having access to the full posterior distribution allowed us to quantify this by calculating the *conditional* correlations between the parameters. We obtained the conditional correlations by conditioning the posterior on one parameter dimension—i.e., holding it at a fixed value—and calculating the correlation between samples drawn from the resulting two-dimensional conditional posterior, once for each of the three parameters  $\theta_{pre}$ ,  $\theta_{post}$  and  $\theta_{postAll}$  (see Methods & Materials for details). The resulting correlation coefficients were substantially higher than without conditioning:  $-0.99$  between  $\theta_{pre}$  and  $\theta_{post}$  and  $0.99$  between the other two parameter combinations (see Suppl. Fig. S3 for a visualization of the conditional posteriors). This result confirmed that while the overall range of data-compatible wiring rule parameters is relatively large (Fig. 3a), once one parameter is fixed, the other two are constrained to a very small range of values. Furthermore, the strong conditional posterior correlations indicated that the DSO rule with three parameters is overparametrized, i.e., a parametrization of the DSO rule with only two parameters likely suffices to explain the measured data (see Supplementary material for details). Collectively, the inferred posterior suggested that the number of presynaptic boutons and the number of postsynaptic contact sites (and, by extension, axonal and dendritic path length) are sensitive and strongly interdependent structural features for predicting synaptic connectivity.

SBI posterior predicts unobserved connection probabilities.

To demonstrate the utility of SBI-enabled generative models as a tool for hypothesis generation, we investigated how one can make predictions on unobserved data. Above, we used SBI to constrain the wiring rule parameters with only the seven measured connection probabilities. However,

in principle, the structural model provides access to the entire (simulated) connectome of one barrel cortex column. Thus, it allows us to make predictions about other features of the connectome that were not measured yet. To test this approach, we repeated the SBI training procedure seven times, holding out each connectivity measurement once from the training data set, i.e., we trained the posterior estimator on pairs of parameters and data,  $(\theta, x)$ , where  $x$  has six entries instead of seven. After training, we obtained seven different posteriors, each conditioned on six of the seven measured connection probabilities. We then sampled parameter values from every posterior, simulated the corresponding barrel cortex connectomes, and calculated *all seven* connection probabilities.

The predictions for held-out measurements clustered around the actual measurement values for most of the seven connection probabilities (Fig 3c) and closely resembled the predictive distributions of the posterior inferred given all measurements (Fig 3b). Quantitatively, we found that the predictions were within one standard deviation of the measurements (given the sample size used in the experiments, see *Methods & Materials* for details). A classifier trained to distinguish between the predictions of the posterior inferred from all measurements and predictions for held-out measurements achieved an accuracy of 0.68 for L4SS, 0.58 for L5PT, and  $< 0.55$  accuracy for all other measurements (0.5 being the chance level). This cross-validation approach indicated that the structural model paired with the SBI-enabled wiring rule enables us to make experimentally testable predictions. For example, one could predict connection probabilities of cell types different from the seven measured here or other connectivity features of the rat barrel cortex available in the structural model (see below).

### Using SBI to rule out invalid wiring hypotheses

Above, we demonstrated that SBI provides a quantitative way to identify valid wiring rule configurations from a large set of hypothesized wiring rules. SBI can also be used to rule out invalid hypotheses, e.g., to show that an existing hypothesis does not agree with empirical data. One such debated hypothesis in connectomics is the so-called *Peters' rule* (*Peters and Feldman, 1976; Braithenberg and Schüz, 1991*). According to this hypothesis, neurons form connections whenever their axons and dendrites are in close proximity, i.e., Peters' rule can be formulated as "axo-dendritic proximity predicts connectivity" (*Udvary et al., 2022*). However, several empirical and theoretical approaches found substantial evidence against Peters' rule (e.g., *Mishchenko et al., 2010; Kasthuri et al., 2015; Rees et al., 2017; Udvary et al., 2022*).

Here, we show that SBI provides an alternative, quantitative way to discard this hypothesis for the rat barrel cortex. We formulated two wiring rules that implement the proximity hypothesis in the structural model of the barrel cortex at two spatial scales: one predicting connections on the neuron-to-neuron level (Fig. 4) and one predicting synapse counts at the subcellular level (Fig. 5). Both wiring rules have one free parameter, i.e., they incorporate many different proximity hypotheses, but there is one particular parameter value corresponding to Peters' rule. We used SBI to infer the posterior distribution over the rule parameters given the seven measured VPM-barrel cortex connection probabilities. Subsequently, we compared inferred parameter values and their predictions with those corresponding to Peters' rule.

### Neuron-level rule

At the neuron-to-neuron level, we defined the proximity of two neurons as the number of subvolumes  $v$  they share in the structural model and introduced a threshold parameter acting on the proximity: Neurons  $i$  and  $j$  form a connection  $c_{ij}$  if the number of subvolumes  $v_{ij}$  that contain presynaptic structures of neuron  $i$  and postsynaptic structures of neuron  $j$ , exceeds a threshold parameter  $\theta_{thres}$ :

$$c_{ij}(\theta_{thres}) = 1 \text{ if } v_{ij} > \theta_{thres} \text{ else } 0. \quad (3)$$



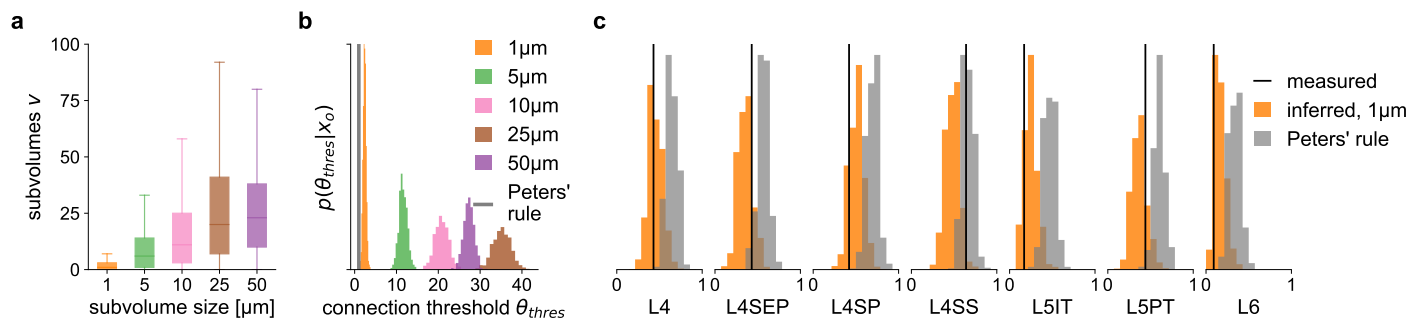

**Figure 4. Neuron-level wiring rule inferred with SBI differs from Peters' rule.** We used SBI to infer a proximity-based wiring rule at different spatial resolutions of the rat barrel cortex model and compared its predictions to that of Peters' rule. (a) Distributions of the shared subvolumes  $v$  between neurons in the barrel cortex model for each spatial resolution (subvolume edge length, see legend in (b)). (b) SBI posteriors inferred over the connection threshold parameter of the wiring rule ( $\theta_{thres}$ , number of shared subvolumes required to form a connection), shown for each spatial resolution (colors), and for Peters' rule assuming  $\theta_{thres} = 1$  (gray). (c) Connection probabilities simulated from the inferred posterior (orange) and Peters' rule (gray) compared to the measured connection probabilities (black).

326 To compare the resulting pair-wise connections between neurons in the barrel cortex model to the  
 327 measured connection probabilities, we mapped them to the corresponding population connection  
 328 probabilities as described above (see section *Methods & Materials* for details).

329 The structural feature used in this rule is the number of shared subvolumes between two neu-  
 330 rons (in contrast to the *subcellular* features used in the DSO rule above). This feature directly de-  
 331 pends on the spatial resolution of the structural model, i.e., the edge length of the subvolume used  
 332 to construct the model. Therefore, we calculated the structural features at five different spatial res-  
 333 olutions: 50, 25, 10, 5, and 1  $\mu\text{m}$ . We found that the overall number of shared subvolumes among  
 334 neurons increased with edge length, reflecting the increase in subvolume size (Fig. 4a).

335 When applying Peters' rule to the barrel cortex model at the neuron level, a connection occurs  
 336 whenever two neurons share at least one subvolume, i.e., the connection threshold would be  
 337  $\theta_{thres} = 1$ . Does this assumption hold for the barrel cortex at the neuron-to-neuron level as well? To  
 338 answer this question quantitatively, we used SBI to infer the threshold parameter  $\theta_{thres}$  of the neu-  
 339 ron level rule for each edge length. We observed that the inferred threshold parameters shifted  
 340 to larger values with increasing edge length, e.g., the higher spatial resolution, the fewer common  
 341 subvolumes were required to obtain a connection (Fig. 4b). This was in line with our observation  
 342 that the overall number of shared subvolumes available in the structural model increased with in-  
 343 creasing edge length (Fig. 4a). However, irrespective of the spatial resolution, all inferred threshold  
 344 parameters were substantially larger than the  $\theta_{thres} = 1$  of Peters' rule, reaching from  $\theta_{thres} \approx 3$  (pos-  
 345 terior mean) for the 1  $\mu\text{m}$ -subvolume model (Fig. 4b, orange) to  $\theta_{thres} \approx 28$  for the 50  $\mu\text{m}$ -subvolume  
 346 model (Fig. 4b, violet). Accordingly, the comparison of the predictive performance of the inferred  
 347 rule and Peters' rule showed that only the data simulated from the inferred rule centered around  
 348 the measured data (Fig. 4c, orange and gray, respectively).

#### 349 Synapse-level rule

350 We repeated this test of Peters' rule at the subcellular level as well. Here, we defined a probabilistic  
 351 rule: Whenever a presynaptic structure of neuron  $i$  and a postsynaptic structure of neuron  $j$  are  
 352 present within the same subvolume  $k$ , they form a synapse with probability  $\theta_{prob}$ :

$$c_{i,j,k}(\theta_{prob}) \sim \text{Bernoulli}(\theta_{prob}) \text{ if axon of } i \text{ and dendrite of } j \text{ are present in } k. \quad (4)$$

353 This rule predicts synapses for every neuron-pair-subvolume combination using the structural  
 354 model with subvolumes of 1  $\mu\text{m}$  edge length. To compare the simulated synapse counts to the  
 355 measured connection probabilities, we calculated simulated connection probabilities as described  
 356 above. The posterior distribution over the connection probability parameter  $\theta_{prob}$  inferred with SBI

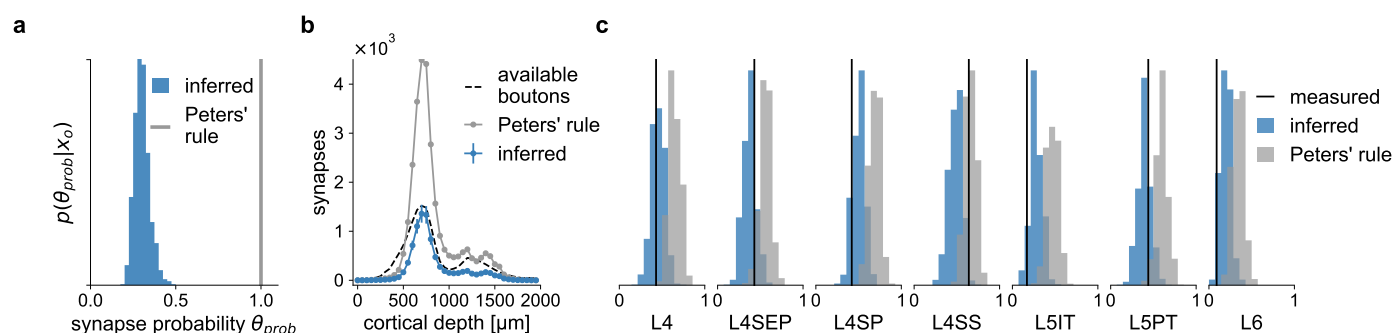

**Figure 5. Synapse-level wiring rule inferred with SBI differs from Peters' rule.** We compared an SBI-inferred parametrized wiring rule predicting synapse counts on the subcellular level with a corresponding formulation of Peters' rule. **(a)** SBI posterior for the wiring rule parameter  $\theta$  (probability of forming a synapse if two neurons are close), compared to Peters' rule assuming  $\theta = 1$  (gray). **(b)** Number of synapses predicted by the inferred posterior (blue) and Peters' rule (gray) compared to the number of presynaptic boutons realistically available in the structural model (dashed black), plotted over the entire cortical depth of the barrel cortex column. **(c)** Connection probabilities simulated from the inferred synapse level posterior (blue) and Peters' rule (gray) compared to the measured connection probabilities (black).

centered around  $\theta_{prob} \approx 0.3$  (Fig. 5a). This result suggests that in only thirty percent of the locations where axon and dendrite are close to each other (shared  $1 \mu\text{m}$  subvolume), the rule predicts a synapse, which is substantially lower than the value of  $\theta_{prob} = 1$  corresponding to Peters' rule. Accordingly, simulating parameter values sampled from the posterior resulted in connection probabilities closer to the measured ones than those predicted by Peters' rule (Fig. 5c, blue vs. gray).

For another comparison of Peters' rule with the inferred wiring rule at the synapse level, we leveraged the predictive properties of the structural model and the SBI posterior. In particular, the structural model provides access to estimates of the number of biologically available boutons across the cortical depth of the barrel cortex column (Udvary et al., 2022). The SBI posterior allowed us to simulate data according to the inferred wiring rule parameters. Thus, it was possible to compare the estimate of the number of empirically available boutons of each presynaptic VPM neuron with the number of simulated synapses from the inferred wiring rule and Peters' rule. We found that the inferred rule predicted synapses close to or below the total number of available boutons (Fig. 5b), in contrast to Peters' rule, which predicted more synapses than biologically plausible.

Our results demonstrate how SBI can be applied to different wiring rules to quantitatively rule out a specific invalid hypothesis: One incorporates the hypothesis into a parametrized model and compares the SBI-inferred parameters to those corresponding to the hypothesis. In the case of Peters' rule, the inferred posteriors showed that axo-dendritic proximity alone cannot predict connectivity observed empirically in the rat barrel cortex—it consistently predicts too many connections (Fig. 4c,d). This finding is in line with previous results showing that the number of dendrites and axons close to each other exceeds the number of synapses by 1-2 orders of magnitude (Udvary et al., 2022). Thus, we can conclude that to explain connectivity in the rat barrel cortex, wiring rules cannot be based solely on axo-dendritic proximity. They also have to take into account subcellular features like pre- and post-synaptic structures along axons and dendrites.

## Discussion

What principles are behind the complex connectivity patterns of neural networks that shape brain function? Connectomics aims to answer this question by acquiring detailed data about the structural and functional composition of the brain. Over the last few years, the development of new computational approaches for analyzing the resulting large amounts of data and testing the derived hypotheses gained momentum (Triesch and Hilgetag, 2016; Peyser et al., 2019). One computational approach is to leverage generative models for testing hypotheses about the connectome, e.g., to implement a hypothesized wiring rule in a computational model and ask whether model

simulations can reproduce the measured connectivity patterns of a specific brain region (*Váša and Mišić, 2022*). However, identifying the free parameters in the wiring rule that reproduce measured connectivity data can be challenging.

We introduced a method that renders the generative modeling approach to connectomics more efficient, enabling us to systematically infer *all* data-compatible parameters of a given computational model. Instead of manually refining a specific generative model to match the data, we equipped it with parameters such that it represents several candidate hypotheses. We then used Bayesian parameter inference to infer the posterior distribution over model parameters conditioned on the measured data. The inferred distribution represents all candidate parameter configurations, i.e., hypotheses, capable of reproducing the measured data. By relying on simulation-based inference (SBI) methods that do not require access to the likelihood function of the model, we were able to apply our approach to the simulation-based generative models commonly used in computational connectomics.

To demonstrate the utility of this approach, we employed it to constrain several wiring rules—at different spatial scales—with connectivity measurements from the rat barrel cortex. We first showed that the inference method is accurate in a scenario with a ground-truth reference solution. Next, in the realistic setting with measured connectivity data, we retrieved many different wiring rule configurations that could explain the measured data equally well. Analyzing the geometrical structure of the inferred posterior distribution revealed strong correlations between wiring rule parameters that are in line with their biological interpretations. Importantly, we were able to accurately predict held-out connectivity measurements, demonstrating the method’s utility in making experimentally testable predictions. Finally, we used our approach to quantitatively show that a wiring rule based solely on axo-dendritic proximity cannot explain barrel cortex connectivity measurements. Overall, these results demonstrate the potential benefits of the Bayesian inference approach, i.e., having access to the full posterior distribution over model parameters rather than manually optimizing for individual parameters one hypothesis at a time and the flexibility of SBI in requiring only simulated data to perform inference.

## Related work

The problem of identifying parameters of computational models that reproduce experimentally observed data has been addressed in computational connectomics before. For example, *Vértes et al. (2012)* built a model of functional connections between brain regions and used optimization methods to find single best-fitting parameters capturing the functional MRI data measured in humans. *Klimm et al. (2014)* and *Betzel et al. (2016)* used Monte Carlo sampling methods for optimizing the parameters of synthetic networks of structural connectivity to match the topological properties of human connectomes recorded with MRI. In contrast to our approach, these studies do not perform Bayesian inference but rely on optimization techniques that identify single best-fitting solutions, potentially ignoring other parameters that fit the data equally well.

While there have been Bayesian approaches to computational connectomics, they differed from the approach we proposed here. *Jonas and Kording (2015)* built a probabilistic model of cell type-dependent connectivity in the mouse retina and proposed a non-parametric Bayesian algorithm that automatically predicts cell types and microcircuitry from connectomics data. *Klinger et al. (2021)* performed Bayesian model comparison using a rejection-sampling approach (*Toni et al., 2009*) to compare a set of competing local circuit models in layer 4 of the mouse primary somatosensory cortex based on purely structural connectomics data. In contrast to our approach, they inferred the probabilities of several models whose parameters are fixed (i.e., model comparison) and did not infer the parameter of individual models. Moreover, their approach relied on classical rejection-sampling techniques, which are less simulation-efficient compared to the neural-network-based SBI we employed and will likely not scale to higher-dimensional inference problems (Figure S1b; for a detailed comparison, see *Lueckmann et al., 2021*). However, combining both approaches, e.g., using more efficient neural-network-based model comparison techniques (*Boelts*

et al., 2019; Radev et al., 2021) followed by parameter inference with SBI, would be a promising direction for future research.

Aside from the above examples, computational models in connectomics are often implemented as complicated computer simulations that can generate simulated data but for which the underlying likelihood functions are not accessible, thus limiting our ability to perform Bayesian inference. To account for this limitation, we employed simulation-based inference (SBI, Cranmer et al., 2020) methods which only require simulations from the model to perform Bayesian inference. SBI has been applied previously in various fields, ranging from genomics (Bernstein et al., 2021), evolutionary biology (Ratmann et al., 2007; Vecilla et al., 2022), computational and cognitive neuroscience (Gonçalves et al., 2020; Oesterle et al., 2020; Deistler et al., 2022b; Groschner et al., 2022; Sabagh et al., 2020; Hashemi et al., 2022), to robotics (Marlier et al., 2021), global health (de Witt et al., 2020) and astrophysics (Alsing et al., 2018; Dax et al., 2021). For the wiring rule examples presented here, we used sequential neural posterior estimation (SNPE, Papamakarios and Murray, 2016; Lueckmann et al., 2017; Greenberg et al., 2019), which performs neural-network-based conditional density estimation to estimate the posterior distribution from simulated data. Neural-network-based SBI approaches build on recent advances in probabilistic machine learning (Papamakarios and Murray, 2016; Le et al., 2017; Papamakarios et al., 2021) and exhibit several advantages compared to more classical rejection-sampling-based techniques, commonly termed Approximate Bayesian Computation (ABC, Sisson et al., 2018). For example, in contrast to ABC approaches, they do not require selecting a criterion for quantitatively comparing simulated with measured data. Furthermore, they can leverage the ability of neural networks to exploit continuities in the parameter space or automatically learn informative summary features from raw data. As a consequence, they are often more simulation-efficient (Suppl. Fig. S1b) and scale better to problems with more model parameters and high-dimensional data (Lueckmann et al., 2021).

## Applicability and limitations

In this work, we applied SBI to the specific problem of inferring wiring rules that can generate observed connectivity data. A key advantage of SBI is that only data simulated from the model are required to infer the posterior distribution over model parameters. Thus, it is generally applicable to any computational model capable of simulating data from a set of parameters. To give specific examples, one could make the algorithms for generating synthetic functional connectomes proposed by Vértes et al. (2012), Klimm et al. (2014), or Betzel et al. (2016) amenable to SBI by introducing parameters of interests and then use SBI to efficiently identify all data-compatible parameter values.

Posterior-targeting SBI approaches, like the NPE algorithm we used, have the additional advantage that they can obtain the posterior distribution for new data points without retraining the underlying artificial neural networks, i.e., they perform amortized inference (see Papamakarios and Murray, 2016; Gonçalves et al., 2020, for details). Another advantage of SBI is that it can leverage the ability of neural networks to automatically learn informative summary features from observations (see Lueckmann et al., 2017; Chan et al., 2018; Greenberg et al., 2019; Gonçalves et al., 2020; Ramesh et al., 2022, for examples). While we did not exploit this feature for the low-dimensional measured data in the wiring rule examples presented here, we believe that it will be essential for future applications of SBI in computational connectomics, e.g., when dealing with high-dimensional dense reconstructions of electron-microscopy data (Shapson-Coe et al., 2021; MICrONS-Consortium et al., 2021; Turner et al., 2022).

SBI's dependency on simulated data and neural network training also entails several limitations: the inferred posterior distributions are only approximations of the unknown actual posterior distribution. Therefore, applying SBI requires careful evaluation of every problem at hand. In theory, SBI does recover the unknown posterior distribution when given enough training data (Papamakarios and Murray, 2016). In practice, however, the complexity and dimensionality of the posterior distribution determine how many training simulations are required for an accurate approximation

of the posterior. Previous studies have successfully applied SBI in scenarios where the simulator has a runtime on the order of seconds and with up to thirty parameters (Gonçalves et al., 2020; Deistler et al., 2022b; Ramesh et al., 2022), but these numbers strongly depend on the problem and available computational resources.

Another limitation of SBI is the problem of model misspecification. SBI generally assumes that the generative model is well-specified, i.e., that it can simulate data that is very similar to the measured data. If this is not the case, then the inferred posterior can be substantially biased (Frazier et al., 2019; Cannon et al., 2022). We recommend performing prior predictive checks to detect model misspecification, i.e., generating a large set of simulated data with parameters sampled from the prior distribution and checking whether the measured data lies inside the distribution of simulated data, as demonstrated in the wiring rule example (Fig. 2d, see Supplementary material for details). Recent methodological work in SBI addresses this problem, e.g., by automatically detecting model misspecification (Schmitt et al., 2022) or by explicitly incorporating the model mismatch into the generative model (Ward et al., 2022).

More generally, applying SBI to new inference problems requires several choices by the practitioner, from prior predictive checks and model-checking to selecting suitable neural network architectures and validating the inferred posterior distribution. As a general guideline, we recommend following the steps we performed for the wiring rule example: First, we investigated the accuracy of SBI and estimated the required number of training simulations by testing it in a scenario with a known reference solution. Second, we ensured that the inferred posterior distribution has well-calibrated uncertainty estimates using simulation-based calibration (Talts et al., 2020). Third, we checked whether the parameter values identified by SBI accurately reproduced the measured data (see Methods & Materials for details). Additionally, we recommend guiding hyperparameter choices by resorting to well-tested heuristics and default settings available in open-source software packages developed and maintained by the community. We performed all our experiments, evaluation steps, and visualization using the *sbi toolkit* (Tejero-Cantero et al., 2020).

## Conclusion

We present SBI as a method for constraining the parameters of generative models in computational connectomics with measured connectivity data. The key idea of our approach is to initially define a probability distribution over many possible model parameters and then use Bayesian parameter inference to identify all those parameter values that reproduce the measured data. We thereby replace the iterative refinement of individual model configurations with the systematic inference of all data-compatible solutions. Our approach will be applicable to many generative modeling scenarios in computational connectomics, providing researchers with a quantitative tool to evaluate and explore hypotheses about the connectome.

## Methods & Materials

### Code availability

Data and code for reproducing the results are available at <https://github.com/mackelab/sbi-for-connectomics>, including a tutorial on how to apply SBI in computational connectomics in general. For running SBI using SNPE, posterior visualization, and posterior validation, we used the *sbi* package at <https://github.com/mackelab/sbi> (Tejero-Cantero et al., 2020). The benchmarking of SNPE and SMC-ABC methods, including the generation of reference posteriors, was performed using the *sbibm* package at <https://github.com/sbi-benchmark> (Lueckmann et al., 2021).

### Bayesian inference for computational connectomics

We introduced Bayesian inference as a tool to identify model parameters of generative models in computational connectomics, given experimentally observed data. Bayesian inference takes a probabilistic view and defines the model parameters and data as random variables. It aims to infer



the conditional probability distribution of the model parameters conditioned on the observed data, i.e., the *posterior distribution*. Bayes' rule defines the posterior distribution as

$$p(\theta|x_{\text{obs}}) = \frac{p(x_{\text{obs}}|\theta)p(\theta)}{p(x_{\text{obs}})}, \quad (5)$$

where  $p(x_{\text{obs}}|\theta)$  is the likelihood of the data given model parameters,  $p(\theta)$  is the prior distribution over model parameters and  $p(x) = \int_{\theta} p(x|\theta)p(\theta)d\theta$  is the so-called *evidence*. Thus, performing Bayesian inference requires three components:

1. Experimentally observed data  $x_{\text{obs}}$ .
2. A *likelihood*  $p(x_{\text{obs}}|\theta)$ , which defines the relationship between model parameters and data. In our setting, the likelihood is implicitly defined by the computational model, i.e., by the simulator generating connectomics data  $x$  given model parameters  $\theta$ . The simulator needs to be stochastic, i.e., when repeatedly executed with a fixed parameter  $\theta$ , it should generate varying data. Technically, given a fixed parameter value  $\theta$ , the likelihood defines a probability distribution over  $x$ , and simulating data corresponds to sampling  $x \sim p(x|\theta)$ .
3. A *prior* distribution  $p(\theta)$ . The prior incorporates prior knowledge about the parameters  $\theta$ , e.g., biologically plausible parameter ranges or known parameter correlations.

The posterior distribution  $p(\theta|x_{\text{obs}})$  inferred through Bayes' rule characterizes all model parameters likely to reproduce the observed data. For example, model parameters with a high probability under the posterior distribution will result in data close to the observed data. In contrast, parameters from low probability density regions will likely generate data different from the observed data.

In most practical applications, it is hard to obtain an analytical solution to Bayes' rule because the evidence  $p(x) = \int p(x|\theta)p(\theta)d\theta$  is challenging to calculate. There exists a large set of methods to perform approximate inference, e.g., Markov Chain Monte Carlo sampling (MCMC, **Rosenbluth and Rosenbluth, 1955; Hogg and Foreman-Mackey, 2018**). MCMC methods can be used to obtain samples from the posterior distribution. However, they require evaluation of the likelihood function of the model, and computational models in connectomics are usually defined as scientific simulators for which no analytical form of the underlying likelihood is available or numerical approximations are computationally expensive.

### Simulation-based inference

Simulation-based inference (SBI, **Cranmer et al., 2020**) allows us to perform Bayesian inference without numerical evaluation of the likelihood by requiring only access to simulations from the model. The idea of SBI is to generate a large set of pairs of model parameters and corresponding simulated data and use it as training data for artificial neural networks (ANN). The employed ANNs are designed to approximate complex probability distributions. Thus, they can be used to approximate the likelihood to then obtain posterior samples via MCMC (**Papamakarios et al., 2017; Lueckmann et al., 2019; Hermans et al., 2020; Boelts et al., 2022**) or the posterior distribution directly (**Papamakarios and Murray, 2016; Lueckmann et al., 2017; Greenberg et al., 2019**). Once trained, the neural networks are applied to the experimentally observed data to obtain the approximate posterior. In our work, we used an SBI approach called *sequential neural posterior estimation* (SNPE, **Papamakarios and Murray, 2016; Greenberg et al., 2019**).

### Neural posterior estimation

Neural posterior estimation (NPE) uses an artificial neural network  $F(x)$  to learn an approximation of the posterior from training data pairs  $\{(\theta_i, x_i)\}_{i=1}^N$ , where  $\theta$  is sampled from a prior  $\theta_i \sim p(\theta)$ , and  $x$  is simulated from the model  $x_i \sim \text{simulator}(\theta_i)$ . The density estimator  $F(x)$  is trained to construct a distribution that directly approximates the *posterior*. It is usually defined as a parametric family  $q_{\phi}$  with parameters  $\phi$ , e.g., a mixture density network (MDN, **Bishop, 1994**), or a normalizing flow (**Papamakarios et al., 2021**). For example, suppose  $q$  is a mixture of Gaussians, then  $F$  would

582 take the data as input and predict the parameters  $\phi$ ,  $\phi = F(x)$ , where  $\phi$  contains the means, the  
583 covariance matrix, and the mixture weight of each mixture component.  $F(x)$  is trained to predict  
584 the parameters  $\phi$  from  $x$  by minimizing

$$-\frac{1}{N} \sum_{i=1}^N \log q_{\phi=F(x_i)}(\theta_i | x_o).$$

585 This training loss implicitly minimizes the Kullback-Leibler divergence between the true poste-  
586 rior and the approximation  $q_{\phi}(\theta|x)$ . It will converge to zero, i.e., NPE will infer the true posterior, in  
587 the limit of infinite training data and given density estimator that is flexible enough (*Papamakarios*  
588 *ios and Murray, 2016; Le et al., 2017*). Algorithm 1 summarizes the algorithmic steps of NPE; see  
589 *Greenberg et al. (2019)* for details.

590 Once NPE is trained on simulated data, it can be applied to the actual observed data  $x_{\text{obs}}$ , e.g.,  
591  $\phi = F(x_{\text{obs}})$ , to obtain an approximation to the desired posterior:

$$q_{\phi}(\theta|x_{\text{obs}}) \approx p(\theta|x_{\text{obs}}). \quad (6)$$

592 Importantly, NPE applies to any newly observed data without retraining the density estimator, i.e.,  
593 the inference with NPE is *amortized*. There is also a sequential variant of NPE called SNPE, where  
594 the training is performed over several rounds to focus the density estimator on a specific obser-  
595 vation  $x_{\text{obs}}$ . In each new round of SNPE, the new training data is not generated with parameters  
596 sampled from the prior but from the posterior estimate of the previous round. While the sequen-  
597 tial approach can be substantially more sampling-efficient compared to NPE, i.e., requiring fewer  
598 training simulations to obtain a good posterior approximation for a given  $x_{\text{obs}}$  (*Lueckmann et al.,*  
599 *2021*), it comes with two caveats. First, it requires retraining for every new  $x_{\text{obs}}$ . Second, using a pro-  
600 posal distribution different from the prior for simulating new data requires a correction, resulting in  
601 additional algorithmic choices and challenges. Over the last few years, different approaches have  
602 been proposed to perform this correction (*Papamakarios and Murray, 2016; Lueckmann et al.,*  
603 *2017; Greenberg et al., 2019; Deistler et al., 2022a*). We used SNPE with the correction proposed  
604 by *Greenberg et al. (2019)*.

---

**Algorithm 1:** Single round Neural Posterior Estimation as in *Papamakarios and Murray (2016)*

---

**input** simulator  $p(\mathbf{x}|\theta)$ , prior  $p(\theta)$ , observed data  $x_{\text{obs}}$   
**for**  $j = 1 : N$  **do**  
    Sample  $\theta_i \sim p(\theta)$   
    Simulate  $\mathbf{x}_i \sim p(\mathbf{x}|\theta_i)$   
**end**  
 $\phi \leftarrow \arg \min -1/N \sum_i^N \log q_{F(\mathbf{x}_i, \phi)}(\theta_i)$   
Set  $\hat{p}(\theta|x_o) = q_{F(x_{\text{obs}}, \phi)}(\theta)$   
**return** Samples from  $\hat{p}(\theta|x_{\text{obs}})$ ; density estimator  $q_{F(\mathbf{x}, \phi)}(\theta)$

---

605 **Posterior validation**

606 In theory and with unlimited training data, NPE will converge to the true (unknown) posterior dis-  
607 tribution. However, training data is limited in practice, and the underlying posteriors can be high-  
608 dimensional and complex. Thus, it is essential to validate the approximate posterior. There are  
609 two common techniques for validating SBI even in the absence of a reference posterior: predictive  
610 checks (*Gelman et al., 2020*) and calibration checks, e.g., simulation-based calibration (SBC, *Cook*  
611 *et al., 2006; Talts et al., 2020*).

## Predictive checks

Predictive checks can be applied to either the prior or the posterior. The *prior predictive check* is applied before the inference. It checks whether the model can produce data close to the experimentally observed data  $x_{\text{obs}}$ , i.e., that the distribution obtained by sampling from the prior and simulating the corresponding data contains  $x_{\text{obs}}$ . If this is not the case, the model or the prior could be misspecified and should be refined before applying SBI. We performed the prior predictive check for the DSO rule simulator by sampling 100,000 parameters from the prior and ensuring that the resulting distribution of simulated connection probabilities covers the seven measured values (see Prior predictive checks for details).

The posterior predictive check tests the predictive performance of the posterior. It should be applied after the inference by simulating data using parameters sampled from the posterior:

$$x_p \sim \text{simulator}(\theta_p) \text{ where } \theta_p \sim p(\theta|x_{\text{obs}}).$$

The simulated data should cluster around the observed data with a variance on the order of the variance expected from the simulator. We performed this check for all inferred wiring rules by simulating 1,000 data points using 1,000 parameters sampled from the corresponding SBI posterior.

## Simulation-based calibration

The variance of the posterior distribution expresses the uncertainty in the parameters. Simulation-based calibration (SBC) provides a way to check whether these uncertainties are, on average, well-calibrated, i.e., that the posterior is (on average) neither too broad (under-confident) nor too narrow (over-confident). The basic idea of SBC is the following. Suppose one uses an SBI method to obtain  $i = 1, \dots, N$  different posteriors  $p(\theta|x_i)$  for different observations  $x_i$  generated from different parameters  $\theta_i$  sampled from the prior. If one determines the rank of each parameter  $\theta_i$  among samples from its corresponding posterior  $p(\theta|x_i)$ , then the posteriors obtained with this SBI method have well-calibrated uncertainties if the collection of all  $N$  ranks follows a uniform distribution (Talts et al., 2020). To check whether the posterior obtained with SBI is well-calibrated, we repeated the inference with NPE  $N = 1000$  times (no retraining required), using data generated from the simulator with parameters sampled from the prior. Subsequently, we performed a visual check for uniformity of the corresponding SBC ranks by comparing their empirical cumulative density function against that of a uniform distribution.

## A generative structural model of the rat barrel cortex

We demonstrated the utility of SBI for computational connectomics by constraining wiring rules in a structural model of the rat barrel cortex with connectivity measurements. To fulfill the prerequisites of Bayesian inference defined above, we set up a simulation-based model for simulating wiring rules in the barrel cortex model. The wiring rule simulator has three components:

1. a *structural model* that provides features (Fig.2a),
2. a parametrized *wiring rule* that is applied to the features to simulate a connectome (Fig.2b),
3. calculation of *summary statistics* from the simulated connectome to match the available measurements (Fig.2c).

### The structural model

The structural model is a digital reconstruction of the rat barrel cortex constructed from detailed measurements of cell types and their morphologies, locations, and sub-cellular features, including single boutons and dendrites, obtained from several animals (Meyer et al., 2010, 2013; Egger et al., 2012, 2014; Narayanan et al., 2015; Udvary et al., 2022). These measurements and their digital reconstructions were copied and arranged according to measured cell type distributions in all cortical layers to obtain a realistic estimate of the structural composition of a large part of

the entire barrel cortex. The model contains around 477,000 excitatory and 77,000 inhibitory neurons, resulting in more than 5.5 billion synaptic sites. Furthermore, it incorporates the projections from the ventral posterior medial nucleus (VPM) of the thalamus to all cortical layers. The model gives access to several cellular and subcellular structural features, including presynaptic boutons and postsynaptic target counts (spine densities). These features were collected for every neuron segment in every subvolume of the model. The model does not contain synaptic connections but only the structural features. Thus, it allows to simulate the effect of different wiring rules by applying the rule to the structural features and comparing the resulting connectome to experimental measurements (Udvary et al., 2022).

#### Dense structural overlap wiring rule

We applied a wiring rule to the structural model to turn it into a simulation-based model that can generate simulated connectomes of the rat barrel cortex. As a wiring rule, we used the dense structural overlap (DSO) rule introduced by (Egger et al., 2014; Udvary et al., 2022), which proposes that two neurons form a synapse depending on their locally available structural subcellular features summarized as DSO. The DSO is the product of the numbers of pre- and postsynaptic structures,  $pre$  and  $post$ , that a presynaptic neuron  $i$  and a postsynaptic neuron  $j$  contribute to a subvolume  $k$  relative to the total number of postsynaptic structures contributed by all neurons,  $postAll$  (Fig.2b):

$$DSO_{i,j,k} = \frac{pre_i \cdot post_j}{postAll_k}. \quad (7)$$

We assumed that the number of connections between any neuron pair  $(i,j)$  within a subvolume  $k$  is given by a Poisson distribution with the DSO as the rate parameter (Egger et al., 2014, Fig.2c):

$$c_{ijk} \sim \text{Poisson}(DSO_{i,j,k}).$$

The DSO rule is stochastic, i.e., it samples different synapse counts every time it is applied to the structural model. However, the contribution of each structural feature to the DSO is fixed. To allow for more flexibility in the relative weighting of each feature, we generalized the DSO rule by introducing three scaling parameters for the three structural features,  $\theta_{pre}$ ,  $\theta_{post}$  and  $\theta_{postAll}$ :

$$DSO_{i,j,k}(\theta) = \frac{pre_i^{\theta_{pre}} \cdot post_j^{\theta_{post}}}{postAll_k^{\theta_{postAll}}}. \quad (8)$$

We rewrote the parametrized rule as a Poisson *generalized linear model* (GLM, **Nelder and Wedderburn, 1972**) by transforming the features to the logarithmic space, stacking them as column vectors in a feature matrix  $X_{ijk} = [\log pre(i, k); \log post(j, k); -\log postAll(k)]$  and arranging the scaling parameters in a vector  $\theta$ :

$$\begin{aligned} DSO_{i,j,k}(\theta) &= \exp \left( \log \left( \frac{pre_i^{\theta_{pre}} \cdot post_j^{\theta_{post}}}{postAll_k^{\theta_{postAll}}} \right) \right) \\ &= \exp (\theta_{pre} \log pre_i + \theta_{post} \log post_j - \theta_{postAll} \log postAll_k) \\ &= \exp (\theta^T X_{ijk}) \\ c_{ijk}(\theta) &\sim \text{Poisson}(\exp(\theta^T X_{ijk})). \end{aligned}$$

The generalized version of the DSO rule takes parameter combination  $\theta$  and generates simulated connectomes in the format of synapse counts. Each new parameter setting corresponds to a different variant of the DSO rule that could have generated the measured data. Note that setting  $\theta = [1, 1, 1]^T$  would result in the expression introduced in equations 7 and 8.

Mapping from simulated connectomes to measured connectivity data

The generalized DSO rule and the chosen prior distribution jointly define a space of simulated connectomes associated with the DSO rule. The last step for constructing a simulation-based model is to map the simulated connectomes to the type of data that can be measured empirically. The measurements available for the barrel cortex are connection probabilities estimated from pairwise recordings between neurons in the ventral posterior medial nucleus (VPM) of the thalamus and different layers and cell types in the cortex: to layer 4 (L4), layer 4 septum (L4SEP), layer 4 star pyramidal cells (L4SP), and layer 4 spiny stellate cells (L4SS) (all measured by *Bruno and Sakmann, 2006*), layer 5 slender-tufted intratelencephalic cells (L5IT), layer 5 thick-tufted pyramidal tract cells (L5PT), and layer 6 (all measured by *Constantinople and Bruno, 2013*).

While the simulated connectome provided access to all neuron-pair-subvolume combinations in the structural model, the measurements were given only as estimated connection probabilities for different cell types. To calculate these connection probabilities from the simulated connectome, we identified the pairs from the presynaptic and postsynaptic neuron populations used in the experiments and calculated the connection probabilities from the corresponding simulated synapse counts. The number of probed neuron pairs was relatively small in the experiments, e.g., around 50 (*Bruno and Sakmann, 2006*). We tried to mimic this experimental setting in the simulation by selecting a random sample of 50 pairs from the thousands of possible pairs available in the simulated connectome. We then checked how many of those neuron pairs connected with at least one synapse for each of the seven populations. Algorithm 2 summarizes the steps for calculating the summary statistics.

---

**Algorithm 2:** Wiring rule simulator and summary statistics calculation

---

**input** structural model  $S$ , wiring rule  $R(\theta)$ , parameter  $\theta \sim p(\theta)$ , measured connectivity data

$x_{\text{obs}}$

**Simulate:**

generate synapse counts for each neuron-pair  $i, j$  in each subvolume  $k$ :

$c_{ijk} \sim \text{simulator}(S, R, \theta)$

**Summarize:**

**for** each population  $m$  measured in  $x_{\text{obs}}$  **do**

Find index set of neuron pairs  $\Pi_m$  belonging to population  $m$

Sample 50 random neuron-pair indices  $\pi \sim \Pi_m$

Estimate population connection probability as average over connected pairs:

$$\sum_{(i,j) \in \pi} \frac{\mathbb{I}(i \leftrightarrow j)}{|\pi|}$$

**end**

**return** simulated connectivity data  $x$

---

Overall, this provided us with a setup to perform Bayesian inference as defined above, to constrain the parameters of a hypothesized wiring rule in the rat barrel cortex:

1. observed data  $x_{\text{obs}}$  given by seven measured connection probabilities between VPM and barrel cortex
2. a stochastic simulation-based model that generates simulated data  $x$  according to the hypothesized DSO rule, given parameters  $\theta$
3. a prior over model parameters  $\theta$

This setup readily extends to other observed data, other simulation-based models, or priors.



## 716 Experimental settings

### 717 Simulation and SBI settings

718 For performing SBI on the DSO rule parameters, we used a Gaussian prior over the three parameters:  
719

$$\theta \sim \mathcal{N}(\mu_0 = [1, 1, 1]^\top, \Sigma_0 = 0.5 I). \quad (9)$$

720 We chose the variance of the prior such that the distribution of simulated connection probabilities  
721 covered the range [0, 1] densely (see [Supplementary material](#) for details).

722 For the inference on the distance-based wiring rules, we used a uniform prior over the shared  
723 subvolume threshold parameter  $\theta_{thres}$  of neuron-level rule

$$\theta_{thres} \sim \mathcal{U}(0, 100),$$

724 and a Beta distribution prior over the synapse probability parameter  $\theta_{prob}$  of the synapse level rule

$$\theta_{prob} \sim \text{Beta}(\alpha = 2, \beta = 2).$$

725 The settings for generating training simulations for SBI were the same for all results: We drew  
726 1,000,000 parameter values from the prior and simulated the corresponding synapse counts or  
727 neuron-level connections, followed by the summary step (except for the simulator used for bench-  
728 marking, see below).

729 To perform SBI, we used (S)NPE with Neural Spline Flows (NSF, [Durkan et al., 2019](#)) as den-  
730 sity estimator. The NSF hyperparameters were: five transforms, two residual blocks of 50 hidden  
731 units each, ReLU non-linearity, and ten spline bins, all as implemented in the public *sbi* toolbox  
732 ([Tejero-Cantero et al., 2020](#)). The training was performed with a training batch size of 1,000, a  
733 validation set proportion of 10%, and a convergence criterion of 20 epochs without improvement  
734 of validation loss. We used the different versions of NPE or SNPE as follows: For the benchmark of  
735 SBI against the MCMC reference posterior, we compared the non-sequential (NPE) and sequential  
736 version (SNPE). For evaluating SBI with simulated data, we used the NPE to leverage its ability to  
737 perform inference repeatedly for many different observations without retraining as needed for  
738 running simulation-based calibration. For the inference on the DSO rule, we used SNPE with ten  
739 rounds to focus the posterior on the measured data. For the inference on the distance-based rules,  
740 we used NPE.

### 741 Validating SBI on the wiring rule simulator

742 We performed two validation steps to ensure that SBI performs reliably when inferring wiring rules  
743 in the structural model of the rat barrel cortex. First, we set up a simplified version of the DSO  
744 rule simulator for which it was possible to obtain a high-quality reference posterior. In particu-  
745 lar, we reduced the number of neuron-pair-subvolume combinations from 130 million available  
746 in the original structural model to only ten. Additionally, we omitted the summary step, such that  
747 running one simulation corresponded to applying the rule to the structural features of the ten  
748 neuron-pair-subvolume combinations and sampling synapse counts from the corresponding Pois-  
749 son distribution. As a consequence, the likelihood of this simplified simulator was accessible, i.e., it  
750 was given by the Poisson distribution, and it was possible to obtain accurate posterior samples us-  
751 ing standard approximate Bayesian inference MCMC sampling ([Hogg and Foreman-Mackey, 2018](#)).

752 We implemented this reduced simulator in the SBI benchmarking framework *sbi* ([Lueck-  
753 mann et al., 2021](#)) and obtained references posterior samples via slice sampling MCMC ([Neal,  
754 2003](#)) using ten parallel chains and sequential importance reweighting ([Rosenbluth and Rosen-  
755 bluth, 1955; Lueckmann et al., 2021](#)), all as implemented in *sbi*. We compared three algorithms:

SNPE, which estimates the posterior in multiple rounds focusing on one specific observation; the single-round variant NPE, which works for many observations without retraining; and a classical sequential rejection-sampling-based algorithm called SMC-ABC (*Sisson et al., 2007; Beaumont et al., 2009*). As a measure of posterior accuracy, we used the classifier-2-sample-test score (C2ST *Lopez-Paz and Oquab, 2018*), defined by the classification accuracy of an artificial-neural-network classifier trained to distinguish the approximate and reference posterior samples. For running SNPE and NPE, we used the `sbi` toolbox (*Tejero-Cantero et al., 2020*), and for SMC-ABC, we used the implementations provided in `sbim`. Generating the training data for the SBI algorithm by simulation data from the model can be a crucial computational factor. To investigate the simulation efficiency of different SBI algorithms for our inference problem, we performed a quantitative comparison of the number of training simulations and the resulting accuracy of the approximate posterior by repeating inference with SMC-ABC, NPE, and SNPE for a simulation budget of 1,000; 10,000; 100,000 and 1,000,000 simulations.

As a second validation step, we applied SBI to the original version of the DSO rule for which no reference posterior was available. For this setting, we tested the validity of NPE applied to simulated observed data. First, we performed simulation-based calibration (SBC) to check the calibration of the posterior uncertainties inferred by NPE. To run SBC, we trained NPE once on 1,000,000 simulations and then obtained 1,000 different posteriors  $p(\theta|x_i)$  for different observations  $x_i$ , where  $x_i$  was generated from different parameters  $\theta_i$  sampled from the prior. We then collected the individual ranks of the underlying parameter  $\theta_i$  under their posterior and tested whether these ranks were uniformly distributed by visually inspecting their empirical cumulative density functions. Second, we checked whether the parameters identified by the NPE posterior distribution could reproduce the (simulated) observed data. To perform this check, we sampled 1,000 parameters from the posterior inferred given a simulated example observation, simulated corresponding connection probabilities using the DSO rule simulator, and compared them to the observed data.

## Acknowledgment

We thank Auguste Schulz, Guy Moss, and Zinovia Stefanidi for their discussions and comments on a preliminary version of the manuscript.

This work was supported by the German Research Foundation (DFG; SFB 1233 PN 276693517; SPP 2041; Germany's Excellence Strategy MLCoe-EXC number 2064/1 PN 390727645), the German Federal Ministry of Education and Research (BMBF; project ADIMEM, FKZ 01IS18052 A-D; Tübingen AI Center, FKZ: 01IS18039A), and the European Union's Horizon 2020 research and innovation program under the Marie Skłodowska-Curie grant agreement No. 101030918 (to R.G.).

## Author contributions

J.B. and J.H.M. conceived the methodology; J.B. conducted the experiments, data analysis, and software development with help from P.H. and F.Y.; D.U. created the rat barrel cortex model; J.B. created the visualizations with help from P.H., R.G., and J.H.M.; J.B. wrote the paper with help from R.G., J.H.M., and all other authors. J.H.M. provided the principal supervision with help from M.O., H.H., and D.B.

## References

- Alsing J**, Wandelt B, Feeney S. Massive optimal data compression and density estimation for scalable, likelihood-free inference in cosmology. *Monthly Notices of the Royal Astronomical Society*. 2018; 477(3):2874–2885. doi: [10.1093/mnras/sty819](https://doi.org/10.1093/mnras/sty819).
- Avecilla G**, Chuong JN, Li F, Sherlock G, Gresham D, Ram Y. Neural networks enable efficient and accurate simulation-based inference of evolutionary parameters from adaptation dynamics. *PLoS biology*. 2022; 20(5):e3001633. doi: [10.1371/journal.pbio.3001633](https://doi.org/10.1371/journal.pbio.3001633).

- 803 **Beaumont MA**, Cornuet JM, Marin JM, Robert CP. Adaptive approximate Bayesian computation. *Biometrika*.  
804 2009 Dec; 96(4):983–990. doi: [.10.1093/biomet/asp052](https://doi.org/10.1093/biomet/asp052).
- 805 **Bernstein DB**, Sulheim S, Almaas E, Segrè D. Addressing uncertainty in genome-scale metabolic model recon-  
806 struction and analysis. *Genome Biology*. 2021 Feb; 22(1):64. doi: [.10.1186/s13059-021-02289-z](https://doi.org/10.1186/s13059-021-02289-z).
- 807 **Betzel RF**, Avena-Koenigsberger A, Goñi J, He Y, de Reus MA, Griffa A, Vértés PE, Mišić B, Thiran JP, Hagmann  
808 P, van den Heuvel M, Zuo XN, Bullmore ET, Sporns O. Generative models of the human connectome. *Neu-*  
809 *rolmage*. 2016 Jan; 124:1054–1064. doi: [.10.1016/j.neuroimage.2015.09.041](https://doi.org/10.1016/j.neuroimage.2015.09.041).
- 810 **Betzel RF**, Bassett DS. Generative models for network neuroscience: prospects and promise. *Journal of The*  
811 *Royal Society Interface*. 2017 Nov; 14(136):20170623. doi: [.10.1098/rsif.2017.0623](https://doi.org/10.1098/rsif.2017.0623).
- 812 **Billeh YN**, Cai B, Gratiy SL, Dai K, Iyer R, Gouwens NW, Abbasi-Asl R, Jia X, Siegle JH, Olsen SR, et al. Systematic  
813 integration of structural and functional data into multi-scale models of mouse primary visual cortex. *Neuron*.  
814 2020; 106(3):388–403. doi: [.10.1016/j.neuron.2020.01.040](https://doi.org/10.1016/j.neuron.2020.01.040).
- 815 **Bishop CM**. Mixture density networks. Aston University; 1994.
- 816 **Boelts J**, Lueckmann JM, Gao R, Macke JH. Flexible and efficient simulation-based inference for models of  
817 decision-making. *eLife*. 2022 Jul; 11:e77220. doi: [.10.7554/eLife.77220](https://doi.org/10.7554/eLife.77220), publisher: eLife Sciences Publications,  
818 Ltd.
- 819 **Boelts J**, Lueckmann JM, Goncalves PJ, Sprekeler H, Macke JH. Comparing neural simulations by neural density  
820 estimation. In: *2019 Conference on Cognitive Computational Neuroscience* Berlin, Germany: Cognitive Compu-  
821 tational Neuroscience; 2019. p. 578–581. doi: [.10.32470/CCN.2019.1291-0](https://doi.org/10.32470/CCN.2019.1291-0).
- 822 **Braitenberg V**, Schüz A. Peters’ Rule and White’s Exceptions. In: Braitenberg V, Schüz A, editors. *Anatomy of*  
823 *the Cortex: Statistics and Geometry* Studies of Brain Function, Berlin, Heidelberg: Springer; 1991.p. 109–112.  
824 doi: [.10.1007/978-3-662-02728-8\\_21](https://doi.org/10.1007/978-3-662-02728-8_21).
- 825 **Bruno RM**, Sakmann B. Cortex is driven by weak but synchronously active thalamocortical synapses. *Science*.  
826 2006; 312(5780):1622–1627. doi: [.10.1126/science.1124593](https://doi.org/10.1126/science.1124593).
- 827 **Cannon P**, Ward D, Schmon SM, Investigating the Impact of Model Misspecification in Neural Simulation-based  
828 Inference. *arXiv*; 2022. doi: [.10.48550/arXiv.2209.01845](https://doi.org/10.48550/arXiv.2209.01845).
- 829 **Chan J**, Perrone V, Spence J, Jenkins P, Mathieson S, Song Y. A Likelihood-Free Inference Framework for Popula-  
830 tion Genetic Data using Exchangeable Neural Networks. In: *Advances in Neural Information Processing Systems*,  
831 vol. 31 Curran Associates, Inc.; 2018. doi: [.10.1101/267211](https://doi.org/10.1101/267211).
- 832 **Chklovskii DB**, Mel BW, Svoboda K. Cortical rewiring and information storage. *Nature*. 2004 Oct;  
833 431(7010):782–788. doi: [.10.1038/nature03012](https://doi.org/10.1038/nature03012).
- 834 **Constantinople CM**, Bruno RM. Deep cortical layers are activated directly by thalamus. *Science*. 2013;  
835 340(6140):1591–1594. doi: [.10.1126/science.1236425](https://doi.org/10.1126/science.1236425).
- 836 **Cook SR**, Gelman A, Rubin DB. Validation of software for Bayesian models using posterior quantiles. *Journal*  
837 *of Computational and Graphical Statistics*. 2006; 15(3):675–692. doi: [.10.1198/106186006X136976](https://doi.org/10.1198/106186006X136976).
- 838 **Cranmer K**, Brehmer J, Louppe G. The frontier of simulation-based inference. *Proceedings of the National*  
839 *Academy of Sciences*. 2020; doi: [.10.1073/pnas.1912789117](https://doi.org/10.1073/pnas.1912789117).
- 840 **Dax M**, Green SR, Gair J, Macke JH, Buonanno A, Schölkopf B. Real-Time Gravitational Wave Science with Neural  
841 Posterior Estimation. *Physical review letters*. 2021; 127(24):241103. doi: [.10.1103/physrevlett.127.241103](https://doi.org/10.1103/physrevlett.127.241103).
- 842 **Deistler M**, Goncalves PJ, Macke JH. Truncated proposals for scalable and hassle-free simulation-based infer-  
843 ence. In: *Advances in Neural Information Processing Systems 35 (NeurIPS 2022)* Curran Associates, Inc.; 2022.  
844 doi: [.10.48550/arXiv.2210.04815](https://doi.org/10.48550/arXiv.2210.04815).
- 845 **Deistler M**, Macke JH, Gonçalves PJ. Energy-efficient network activity from disparate circuit parameters. *PNAS*.  
846 2022 Nov; 119(44):e2207632119. doi: [.10.1073/pnas.2207632119](https://doi.org/10.1073/pnas.2207632119).
- 847 **Durkan C**, Bekasov A, Murray I, Papamakarios G. Neural spline flows. In: *Advances in Neural Information Pro-*  
848 *cessing Systems* Curran Associates, Inc.; 2019. p. 7509–7520. doi: [.10.48550/arxiv.1906.04032](https://doi.org/10.48550/arxiv.1906.04032).
- 849 **Egger R**, Dercksen VJ, Udvary D, Hege HC, Oberlaender M. Generation of dense statistical connectomes from  
850 sparse morphological data. *Front Neuroanat*. 2014; 8:129. doi: [.10.3389/fnana.2014.00129](https://doi.org/10.3389/fnana.2014.00129).

851 **Egger R**, Narayanan RT, Helmstaedter M, de Kock CPJ, Oberlaender M. 3D Reconstruction and Standardization  
852 of the Rat Vibrissal Cortex for Precise Registration of Single Neuron Morphology. *PLoS Computational Biology*.  
853 2012; 8(12):e1002837. doi: .10.1371/journal.pcbi.1002837.

854 **Frazier DT**, Robert CP, Rousseau J, Model Misspecification in ABC: Consequences and Diagnostics; 2019. <http://arxiv.org/abs/1708.01974>, doi: .10.1111/369-7412/20/82421, arXiv:1708.01974 [math, q-fin, stat].

856 **Gelman A**, Vehtari A, Simpson D, Margossian CC, Carpenter B, Yao Y, Kennedy L, Gabry J, Bürkner PC, Modrák  
857 M, Bayesian Workflow. arXiv; 2020. doi: .10.48550/arXiv.2011.01808.

858 **Gonçalves PJ**, Lueckmann JM, Deistler M, Nonnenmacher M, Öcal K, Bassetto G, Chintaluri C, Podlaski WF, Had-  
859 dad SA, Vogels TP, Greenberg DS, Macke JH. Training deep neural density estimators to identify mechanistic  
860 models of neural dynamics. *eLife*. 2020 Sep; 9:e56261. doi: .10.7554/eLife.56261.

861 **Greenberg D**, Nonnenmacher M, Macke J. Automatic Posterior Transformation for Likelihood-Free Inference.  
862 In: *Proceedings of the 36th International Conference on Machine Learning* PMLR; 2019. p. 2404–2414. doi:  
863 .10.48550/arxiv.1905.07488.

864 **Groschner LN**, Malis JG, Zuidinga B, Borst A. A biophysical account of multiplication by a single neuron. *Nature*.  
865 2022 Mar; 603(7899):119–123. doi: .10.1038/s41586-022-04428-3.

866 **Hashemi M**, Vattikonda AN, Jha J, Sip V, Woodman MM, Bartolomei F, Jirsa VK, Simulation-Based Inference  
867 for Whole-Brain Network Modeling of Epilepsy using Deep Neural Density Estimators. medRxiv; 2022. doi:  
868 .10.1101/2022.06.02.22275860.

869 **Hermans J**, Begy V, Louppe G. Likelihood-free MCMC with Amortized Approximate Ratio Estimators. In: *Pro-*  
870 *ceedings of the 37th International Conference on Machine Learning* PMLR; 2020. p. 4239–4248.

871 **Hogg DW**, Foreman-Mackey D. Data Analysis Recipes: Using Markov Chain Monte Carlo\*. *The Astrophysical*  
872 *Journal Supplement Series*. 2018 May; 236(1):11. doi: .10.3847/1538-4365/aab76e.

873 **Jain V**, Seung HS, Turaga SC. Machines that learn to segment images: a crucial technology for connectomics.  
874 *Current Opinion in Neurobiology*. 2010 Oct; 20(5):653–666. doi: .10.1016/j.conb.2010.07.004.

875 **Jonas E**, Kording K. Automatic discovery of cell types and microcircuitry from neural connectomics. *eLife*. 2015  
876 Apr; 4:e04250. doi: .10.7554/eLife.04250.

877 **Kasthuri N**, Hayworth KJ, Berger DR, Schalek RL, Conchello JA, Knowles-Barley S, Lee D, Vázquez-Reina A, Kaynig  
878 V, Jones TR, Roberts M, Morgan JL, Tapia JC, Seung HS, Roncal WG, Vogelstein JT, Burns R, Sussman DL, Priebe  
879 CE, Pfister H, et al. Saturated Reconstruction of a Volume of Neocortex. *Cell*. 2015 Jul; 162(3):648–661. doi:  
880 .10.1016/j.cell.2015.06.054.

881 **Klimm F**, Bassett DS, Carlson JM, Mucha PJ. Resolving Structural Variability in Network Models and the Brain.  
882 *PLOS Computational Biology*. 2014 Mar; 10(3):e1003491. doi: .10.1371/journal.pcbi.1003491.

883 **Klinger E**, Motta A, Marr C, Theis FJ, Helmstaedter M. Cellular connectomes as arbiters of local circuit models  
884 in the cerebral cortex. *Nature Communications*. 2021 May; 12(1):2785. doi: .10.1038/s41467-021-22856-z.

885 **Kornfeld J**, Denk W. Progress and remaining challenges in high-throughput volume electron microscopy. *Cur-*  
886 *rent Opinion in Neurobiology*. 2018 Jun; 50:261–267. doi: .10.1016/j.conb.2018.04.030.

887 **Le TA**, Baydin AG, Zinkov R, Wood F. Using synthetic data to train neural networks is model-based reason-  
888 ing. In: *2017 International Joint Conference on Neural Networks (IJCNN)*; 2017. p. 3514–3521. doi: .10.1109/I-  
889 *JCNN.2017.7966298*.

890 **Loomba S**, Straehle J, Gangadharan V, Heike N, Khalifa A, Motta A, Ju N, Sievers M, Gempt J, Meyer HS, Helm-  
891 staedter M. Connectomic comparison of mouse and human cortex. *Science*. 2022 Jun; 377(6602):eabo0924.  
892 doi: .10.1126/science.abo0924.

893 **Lopez-Paz D**, Oquab M, Revisiting Classifier Two-Sample Tests. arXiv; 2018. doi: .10.48550/arXiv.1610.06545.

894 **Lueckmann JM**, Bassetto G, Karaletsos T, Macke JH. Likelihood-free inference with emulator networks. In:  
895 *Proceedings of The 1st Symposium on Advances in Approximate Bayesian Inference* PMLR; 2019. p. 32–53. doi:  
896 .10.48550/arxiv.1805.09294.

897 **Lueckmann JM**, Boelts J, Greenberg D, Gonçalves P, Macke J. Benchmarking Simulation-Based Inference. In:  
898 *Proceedings of The 24th International Conference on Artificial Intelligence and Statistics* PMLR; 2021. p. 343–351.  
899 doi: .10.48550/arXiv.2101.04653.

- 900 **Lueckmann JM**, Goncalves PJ, Bassetto G, Öcal K, Nonnenmacher M, Macke JH. Flexible statistical inference  
901 for mechanistic models of neural dynamics. In: *Advances in Neural Information Processing Systems 30* Curran  
902 Associates, Inc.; 2017.p. 1289–1299. doi: .10.48550/arxiv.1711.01861.
- 903 **Luppi AI**, Cabral J, Cofre R, Destexhe A, Deco G, Kringelbach ML. Dynamical models to evaluate structure-  
904 function relationships in network neuroscience. *Nature Reviews Neuroscience*. 2022 Oct; p. 1–2. doi:  
905 .10.1038/s41583-022-00646-w.
- 906 **Macrina T**, Lee K, Lu R, Turner NL, Wu J, Popovych S, Silversmith W, Kemnitz N, Bae JA, Castro MA, Dorkenwald  
907 S, Halageri A, Jia Z, Jordan C, Li K, Mitchell E, Mondal SS, Mu S, Nehoran B, Wong W, et al., Petascale neural  
908 circuit reconstruction: automated methods. *bioRxiv*; 2021. doi: .10.1101/2021.08.04.455162.
- 909 **Marlier N**, Bröls O, Louppe G, Simulation-based Bayesian inference for multi-fingered robotic grasping. *arXiv*;  
910 2021. doi: .10.48550/arXiv.2109.14275.
- 911 **Meyer HS**, Egger R, Guest JM, Foerster R, Reissl S, Oberlaender M. Cellular organization of cortical barrel  
912 columns is whisker-specific. *Proceedings of the National Academy of Sciences*. 2013 Nov; 110(47):19113–  
913 19118. doi: .10.1073/pnas.1312691110, publisher: Proceedings of the National Academy of Sciences.
- 914 **Meyer HS**, Wimmer VC, Oberlaender M, de Kock CPJ, Sakmann B, Helmstaedter M. Number and Laminar  
915 Distribution of Neurons in a Thalamocortical Projection Column of Rat Vibrissa Cortex. *Cerebral Cortex*.  
916 2010 Oct; 20(10):2277–2286. doi: .10.1093/cercor/bhq067.
- 917 **MICrONS-Consortium**, Bae JA, Baptiste M, Bodor AL, Brittain D, Buchanan J, Bumbarger DJ, Castro MA, Celii B,  
918 Cobos E, Collman F, da Costa NM, Dorkenwald S, Elabbady L, Fahey PG, Fliss T, Froudarakis E, Gager J, Gamlin  
919 C, Halageri A, et al. Functional connectomics spanning multiple areas of mouse visual cortex. *bioRxiv*. 2021;  
920 doi: .10.1101/2021.07.28.454025.
- 921 **Mishchenko Y**, Hu T, Spacek J, Mendenhall J, Harris KM, Chklovskii DB. Ultrastructural Analysis of Hip-  
922 pocampal Neuropil from the Connectomics Perspective. *Neuron*. 2010 Sep; 67(6):1009–1020. doi:  
923 .10.1016/j.neuron.2010.08.014.
- 924 **Motta A**, Berning M, Boergens KM, Staffler B, Beining M, Loomba S, Hennig P, Wissler H, Helmstaedter M. Dense  
925 connectomic reconstruction in layer 4 of the somatosensory cortex. *Science*. 2019 Nov; 366(6469):eaay3134.  
926 doi: .10.1126/science.aay3134.
- 927 **Narayanan RT**, Egger R, Johnson AS, Mansvelder HD, Sakmann B, de Kock CPJ, Oberlaender M. Beyond Colum-  
928 nar Organization: Cell Type- and Target Layer-Specific Principles of Horizontal Axon Projection Patterns in  
929 Rat Vibrissa Cortex. *Cerebral Cortex*. 2015 Nov; 25(11):4450–4468. doi: .10.1093/cercor/bhv053.
- 930 **Neal RM**. Slice sampling. *The Annals of Statistics*. 2003 Jun; 31(3):705–767. doi: .10.1214/aos/1056562461.
- 931 **Nelder JA**, Wedderburn RWM. Generalized Linear Models. *Journal of the Royal Statistical Society Series A*  
932 (General). 1972; 135(3):370–384. doi: .10.2307/2344614.
- 933 **Oesterle J**, Behrens C, Schröder C, Hermann T, Euler T, Franke K, Smith RG, Zeck G, Berens P. Bayesian inference  
934 for biophysical neuron models enables stimulus optimization for retinal neuroprosthetics. *eLife*. 2020 Oct;  
935 9:e54997. doi: .10.7554/eLife.54997.
- 936 **Osten P**, Margrie TW. Mapping brain circuitry with a light microscope. *Nature Methods*. 2013 Jun; 10(6):515–  
937 523. doi: .10.1038/nmeth.2477.
- 938 **Papamakarios G**, Murray I. Fast  $\epsilon$ -free Inference of Simulation Models with Bayesian Conditional Den-  
939 sity Estimation. In: *Advances in Neural Information Processing Systems 29* Curran Associates, Inc.; 2016. p.  
940 1028–1036. doi: .10.48550/arxiv.1605.06376.
- 941 **Papamakarios G**, Nalisnick E, Rezende DJ, Mohamed S, Lakshminarayanan B. Normalizing flows for  
942 probabilistic modeling and inference. *Journal of Machine Learning Research*. 2021; 22(57):1–64. doi:  
943 .10.48550/arxiv.1912.02762.
- 944 **Papamakarios G**, Pavlakou T, Murray I. Masked Autoregressive Flow for Density Estimation. In: *Ad-  
945 vances in Neural Information Processing Systems 30* Curran Associates, Inc.; 2017.p. 2338–2347. doi:  
946 .10.48550/arxiv.1705.07057.
- 947 **Peters A**, Feldman ML. The projection of the lateral geniculate nucleus to area 17 of the rat cerebral cortex. I.  
948 General description. *Journal of neurocytology*. 1976; 5(1):63–84. doi: .10.1007/bf01176183.



- 949 **Peyser A**, Diaz Pier S, Klijn W, Morrison A, Triesch J. Editorial: Linking experimental and computational connec-  
950 tomics. *Network Neuroscience*. 2019 Sep; 3(4):902–904. doi: .10.1162/netn\_e\_00108.
- 951 **Radev ST**, D'Alessandro M, Mertens UK, Voss A, Köthe U, Bürkner PC. Amortized Bayesian Model Comparison  
952 With Evidential Deep Learning. *IEEE Transactions on Neural Networks and Learning Systems*. 2021; p. 1–15.  
953 doi: .10.1109/TNNLS.2021.3124052.
- 954 **Ramesh P**, Lueckmann JM, Boelts J, Tejero-Cantero A, Greenberg DS, Goncalves PJ, Macke JH. GATSBI: Genera-  
955 tive Adversarial Training for Simulation-Based Inference. In: *International Conference on Learning Representa-*  
956 *tions*; 2022. doi: .10.48550/arxiv.2203.06481.
- 957 **Ratmann O**, Jørgensen O, Hinkley T, Stumpf M, Richardson S, Wiuf C. Using Likelihood-Free Inference to Com-  
958 pare Evolutionary Dynamics of the Protein Networks of *H. pylori* and *P. falciparum*. *PLOS Computational*  
959 *Biology*. 2007 Nov; 3(11):e230. doi: .10.1371/journal.pcbi.0030230.
- 960 **Rees CL**, Moradi K, Ascoli GA. Weighing the Evidence in Peters' Rule: Does Neuronal Morphology Predict Con-  
961 nectivity? *Trends in Neurosciences*. 2017 Feb; 40(2):63–71. doi: .10.1016/j.tins.2016.11.007.
- 962 **Reimann MW**, King JG, Muller EB, Ramaswamy S, Markram H. An algorithm to predict the connectome of  
963 neural microcircuits. *Frontiers in Computational Neuroscience*. 2015; 9. doi: .10.3389/fncom.2015.00120.
- 964 **Rosenbluth MN**, Rosenbluth AW. Monte Carlo calculation of the average extension of molecular chains. *The*  
965 *Journal of Chemical Physics*. 1955; 23(2):356–359. doi: .10.1063/1.1741967.
- 966 **Sabbagh D**, Ablin P, Varoquaux G, Gramfort A, Engemann DA. Predictive regression modeling with  
967 MEG/EEG: from source power to signals and cognitive states. *NeuroImage*. 2020 Nov; 222:116893. doi:  
968 .10.1016/j.neuroimage.2020.116893.
- 969 **Schmitt M**, Bürkner PC, Köthe U, Radev ST, Detecting Model Misspecification in Amortized Bayesian Inference  
970 with Neural Networks. *arXiv*; 2022. doi: .10.48550/arXiv.2112.08866.
- 971 **Shapson-Coe A**, Januszewski M, Berger DR, Pope A, Wu Y, Blakely T, Schalek RL, Li P, Wang S, Maitin-  
972 Shepard J, Karlupia N, Dorkenwald S, Sjostedt E, Leavitt L, Lee D, Bailey L, Fitzmaurice A, Kar R, Field B,  
973 Wu H, et al. A connectomic study of a petascale fragment of human cerebral cortex. *bioRxiv*. 2021; doi:  
974 .10.1101/2021.05.29.446289.
- 975 **Sisson SA**, Fan Y, Tanaka MM. Sequential Monte Carlo without likelihoods. *Proceedings of the National*  
976 *Academy of Sciences*. 2007 Feb; 104(6):1760–1765. doi: .10.1073/pnas.0607208104.
- 977 **Sisson SA**, Fan Y, Beaumont M. Handbook of approximate Bayesian computation. Chapman and Hall/CRC;  
978 2018. doi: .10.48550/arxiv.1802.09720.
- 979 **Sporns O**, Bassett DS. Editorial: New Trends in Connectomics. *Network Neuroscience*. 2018 Jun; 2(2):125–127.  
980 doi: .10.1162/netn\_e\_00052.
- 981 **Sporns O**, Tononi G, Kötter R. The Human Connectome: A Structural Description of the Human Brain. *PLOS*  
982 *Computational Biology*. 2005 Sep; 1(4):e42. doi: .10.1371/journal.pcbi.0010042.
- 983 **Talts S**, Betancourt M, Simpson D, Vehtari A, Gelman A, Validating Bayesian Inference Algorithms with  
984 Simulation-Based Calibration. *arXiv*; 2020. doi: .10.48550/arXiv.1804.06788.
- 985 **Tejero-Cantero\* A**, Boelts\* J, Deistler\* M, Lueckmann\* JM, Durkan\* C, Gonçalves PJ, Greenberg DS, Macke JH.  
986 sbi: A toolkit for simulation-based inference. *Journal of Open Source Software*. 2020 Aug; 5(52):2505. doi:  
987 .10.21105/joss.02505.
- 988 **Toni T**, Welch D, Strelkowa N, Ipsen A, Stumpf MPH. Approximate Bayesian computation scheme for param-  
989 eter inference and model selection in dynamical systems. *Journal of The Royal Society Interface*. 2009 Feb;  
990 6(31):187–202. doi: .10.1098/rsif.2008.0172.
- 991 **Triesch J**, Hilgetag CC. Computational connectomics. *e-Neuroforum*. 2016 Sep; 7(3):43–44. doi:  
992 .10.1007/s13295-016-0029-z.
- 993 **Turner NL**, Macrina T, Bae JA, Yang R, Wilson AM, Schneider-Mizell C, Lee K, Lu R, Wu J, Bodor AL, Bleckert AA,  
994 Brittain D, Froudarakis E, Dorkenwald S, Collman F, Kemnitz N, Ih D, Silversmith WM, Zung J, Zlateski A, et al.  
995 Reconstruction of neocortex: Organelles, compartments, cells, circuits, and activity. *Cell*. 2022; 185:1082–  
996 1100.e24. doi: .10.1016/j.cell.2022.01.023.

- 997 **Udvary D**, Harth P, Macke JH, Hege HC, de Kock CPJ, Sakmann B, Oberlaender M. The impact of  
998 neuron morphology on cortical network architecture. *Cell Reports*. 2022 Apr; 39(2):110677. doi:  
999 .10.1016/j.celrep.2022.110677.
- 1000 **Valdes-Aleman J**, Fetter RD, Sales EC, Heckman EL, Venkatasubramanian L, Doe CQ, Landgraf M, Cardona A,  
1001 Zlatić M. Comparative Connectomics Reveals How Partner Identity, Location, and Activity Specify Synaptic  
1002 Connectivity in *Drosophila*. *Neuron*. 2021 Jan; 109(1):105–122.e7. doi: .10.1016/j.neuron.2020.10.004.
- 1003 **Váša F**, Mišić B. Null models in network neuroscience. *Nature Reviews Neuroscience*. 2022 Aug; 23(8):493–504.  
1004 doi: .10.1038/s41583-022-00601-9.
- 1005 **Vértes PE**, Alexander-Bloch AF, Gogtay N, Giedd JN, Rapoport JL, Bullmore ET. Simple models of human brain  
1006 functional networks. *Proceedings of the National Academy of Sciences*. 2012; 109(15):5868–5873. doi:  
1007 .10.1073/pnas.1111738109.
- 1008 **Ward D**, Cannon P, Beaumont M, Fasiolo M, Schmon SM. Robust Neural Posterior Estimation and Statistical  
1009 Model Criticism. In: *Advances in Neural Information Processing Systems 30* Curran Associates, Inc.; 2022. doi:  
1010 .10.48550/arXiv.2210.06564.
- 1011 **de Witt CS**, Gram-Hansen B, Nardelli N, Gambardella A, Zinkov R, Dokania P, Siddharth N, Espinosa-Gonzalez  
1012 AB, Darzi A, Torr P, Baydin AG, Simulation-Based Inference for Global Health Decisions. *arXiv*; 2020. doi:  
1013 .10.48550/arXiv.2005.07062.

# Supplementary figures

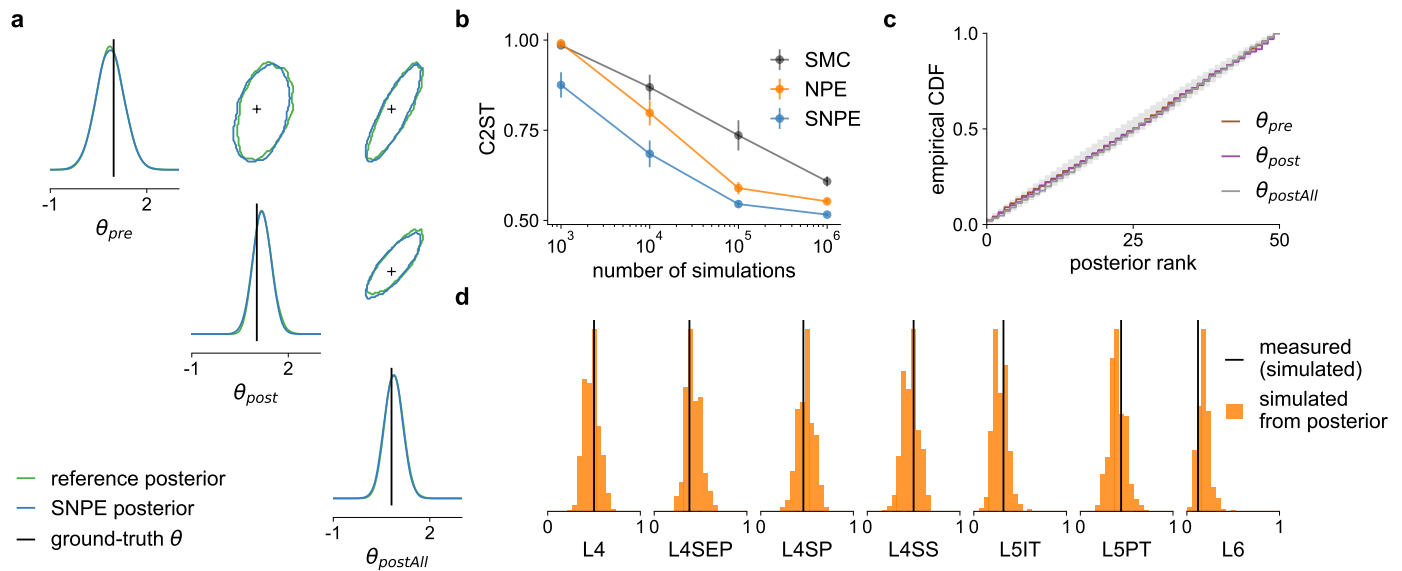

**Supplementary Figure S1. Validating SBI over wiring rule parameters with simulated data.** (a) Comparison of the posterior over wiring rule parameters inferred with SBI (using the SNPE algorithm, blue) and the reference solution (ground-truth parameters in black). (b) Inference accuracy in terms of classifier-2-sample-test accuracy (C2ST) between reference solution and three SBI algorithms, plotted as a function of training simulations (0.5 is best, error bars show standard error over ten different observations). (c) Distributions of posterior ranks from Simulation-based calibration, obtained for each parameter separately from NPE applied to the full version of the DSO rule simulator. A well-calibrated posterior should have uniformly distributed ranks, as indicated by the area shaded gray. (d) Comparison of data simulated with samples drawn from the NPE posterior (posterior predictive distribution, orange) and the underlying observed data (simulated, black).

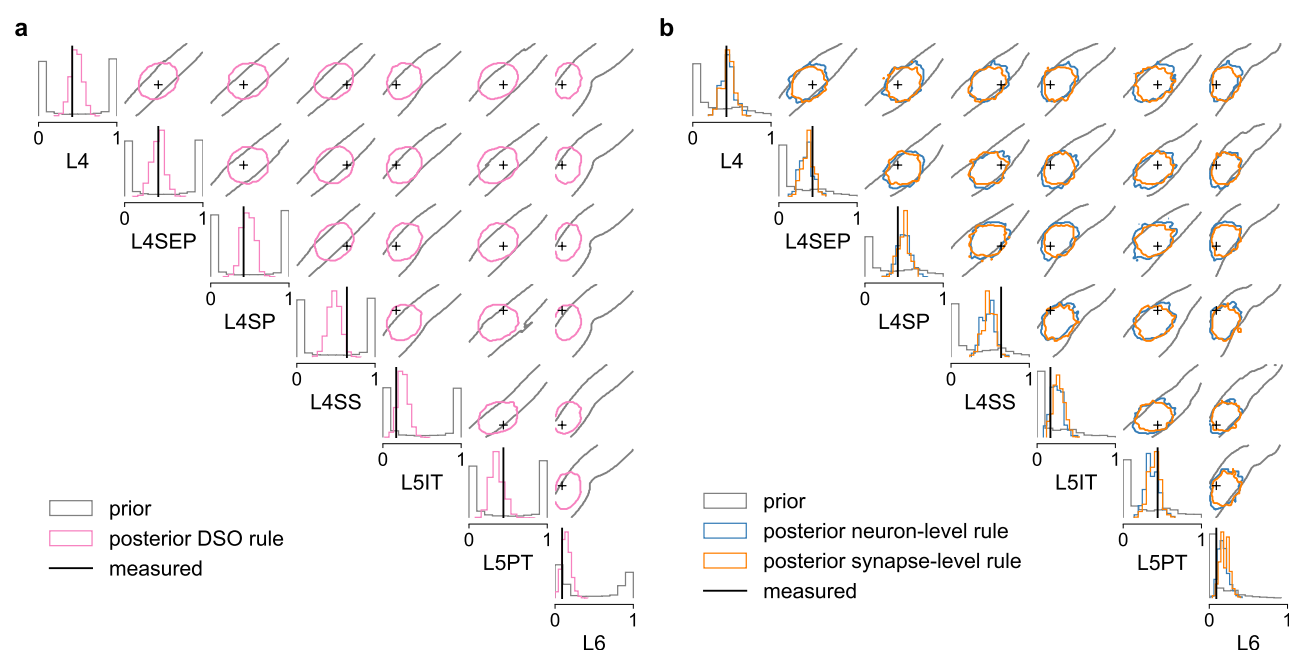

**Supplementary Figure S2. Predictive distributions.** Comparison of connection probabilities simulated from the prior (gray), the SBI posterior (colors), and the measured data (black). Shown for the dense structural overlap rule (DSO) (see Results) in (a) and for the proximity-based wiring rules on the neuron level and the synapse level in (b). The prior predictive distributions cover a wide range of values, whereas the posterior predictive distributions cluster around the measured connection probabilities taking into account the measurement noise.

## Supplementary material

### Prior predictive checks

An essential requirement for a generative model is that it can actually generate the measured data, i.e., that the model is not misspecified. The prior predictive distribution shows all data that can be generated by the model when sampling parameters from the prior. Thus, this distribution provides a tool to check for misspecification. For the wiring rule simulator, the prior predictive is a seven-dimensional distribution (Fig. S4b).

We found that with the chosen setting of the prior, simulator, and summary statistics (see Algorithm 2), the prior predictive distribution covers a large range of plausible values, including the experimental measurements (Fig. S4b). The two-dimensional marginals show strong positive correlations between all seven connection probabilities and additional blocks of stronger correlations within layer 4 (L4, L4SEP, L4SP, L4SS) and layer 5 (L5PT, L5IT), visible in the correlations matrix (Fig. S4a). These correlations are plausible because all populations share the same source populations in the thalamus, and the blocks of stronger correlations correspond to connection probabilities within the same target layer in the cortex. Furthermore, depending on the number of neuron pairs used to calculate connection probabilities (see Mapping from simulated connectomes to measured connectivity data), the simulator accurately matches the empirical variance expected from the measured data (Fig. S4c). These results indicated that a subsampling of 50 pairs was adequate to model the experiments.

### Alternative parametrizations of the dense structural overlap rule

The strong conditional correlations between the three parameters of the dense structural overlap rule (DSO, see Posterior analysis reveals biologically plausible parameter interactions) indicated that an alternative parametrization of the DSO rule, e.g., using only two parameters, could also be able to explain the measured data. We tested this hypothesis by changing the DSO rule as follows.

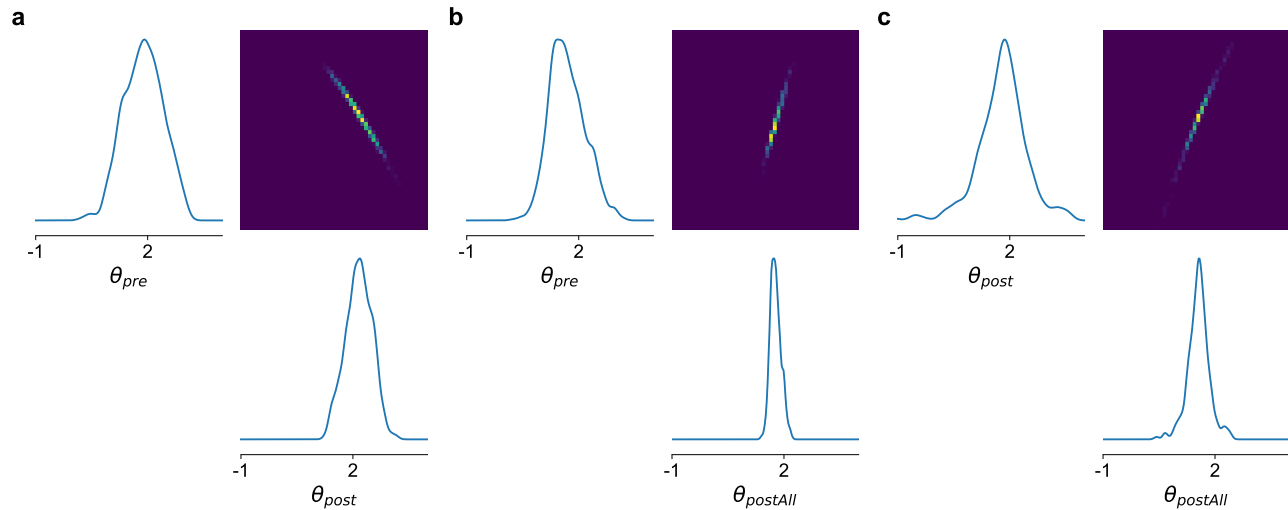

**Supplementary Figure S3. Conditional posterior distributions.** We obtained conditional posterior distributions for the DSO rule (see Results) by conditioning one of the three parameters to a value drawn from the posterior. The resulting two-dimensional posterior over  $\theta_{pre}$  and  $\theta_{post}$  (a),  $\theta_{pre}$  and  $\theta_{postAll}$  (b) and  $\theta_{post}$  and  $\theta_{postAll}$  (c), showed strong correlations as visible on the off-diagonal two-dimension marginals.

The initial formulation of the rule is given by

$$DSO_{i,j,k}(\theta) = \frac{pre_i^{\theta_{pre}} \cdot post_j^{\theta_{post}}}{postAll_k^{\theta_{postAll}}} \quad (10)$$

The  $postAll$  structural feature in the denominator contains the post-synaptic target densities of *all* post-synaptic structures in a given subvolume  $k$  of the structural model, including the  $post_j$  features. It acts as a normalizing factor for the rule, e.g., when the weight  $\theta_{post}$  increases, a corresponding increase in  $\theta_{postAll}$  can maintain a similar overall DSO value. We changed the DSO rule by removing the parameter  $\theta_{postAll}$ , but including the *scaled* features  $post_j^{\theta_{post}}$  into  $postAll$ , instead of only taking  $post$ . By taking the scaled version, we maintained the normalizing property of the denominator of the DSO rule: If  $\theta_{post}$  was high, in the initial three-parameter formulation of the DSO rule, this could be compensated by a corresponding increase in  $\theta_{postAll}$ . While this was not possible anymore in the two-param version, the compensation occurred implicitly by including the scaled  $post_j$  features:

$$DSO_{i,j,k}(\theta) = \frac{pre_i^{\theta_{pre}} \cdot post_j^{\theta_{post}}}{(post_j^{\theta_{post}} + postAll_{k,-j})} \quad (11)$$

1035 We performed SBI using the same settings as before to obtain the posterior distribution over  
1036 the two parameters of the reduced DSO rule (Fig. S5a). The resulting posterior predictive distri-  
1037 bution showed similar accuracy to the one of the three-parameter DSO rule (compare Fig. S5b  
1038 versus Fig. 3b). This result indicates that the two-parameter DSO rule provides an alternative to  
1039 the three-parameter rule.



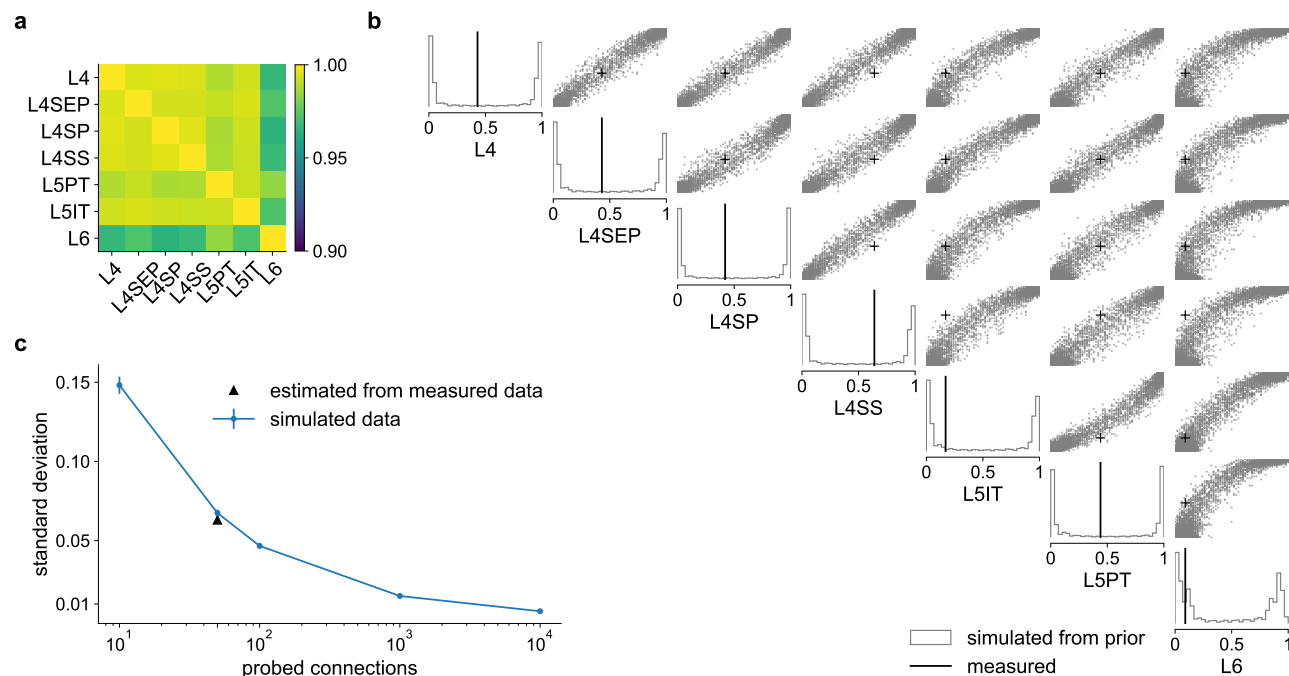

**Supplementary Figure S4. Prior predictive distribution for the DSO rule.** (a) Estimated correlation matrix of the seven connection probabilities generated from the model (note the restricted range of the color map). (b) Marginal plot of the prior predictive distribution showing data simulated from 10k samples from the prior; one-dimensional marginal as histograms on the diagonal and two-dimensional marginals as scatter plots on the upper triangular subplots; literature data in black. (c) Size of the random subset of neuron pairs used to calculate the connection probabilities plotted against the resulting standard deviation (std) in the simulated connection probabilities. Calculated from 1,000 simulations given the same parameters, averaged over the seven connection probabilities (blue); compared with the empirical variance expected from the sample sizes used in the experiments in the literature (black).

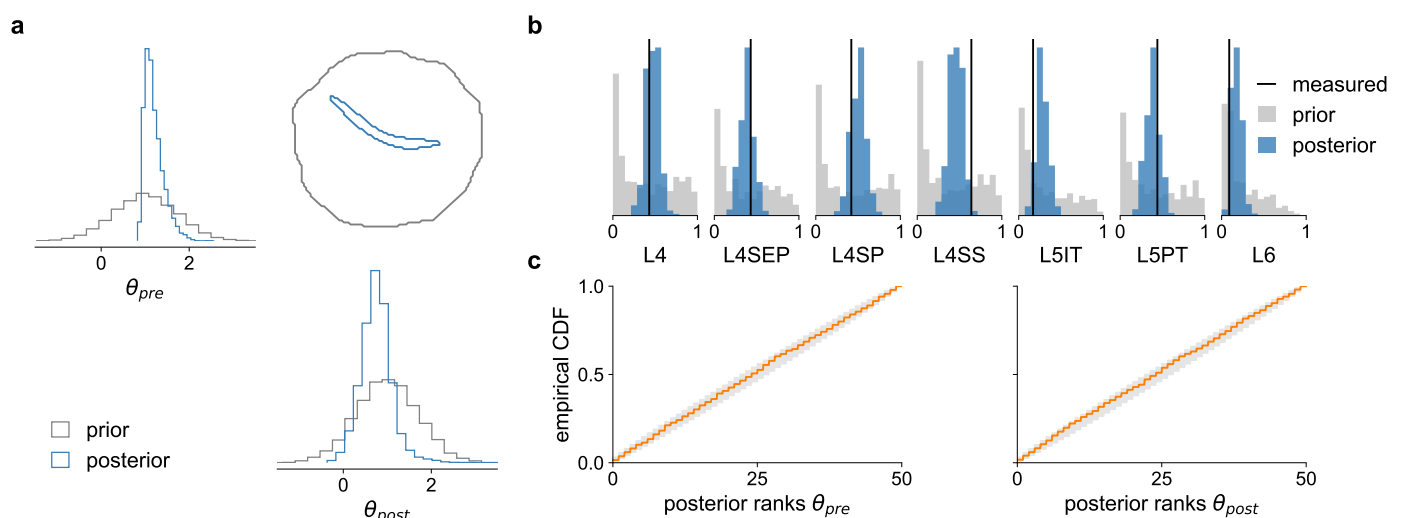

**Supplementary Figure S5. SBI results for the two-parameter DSO rule.** (a) Posterior distribution (blue) over the two parameters of the reduced DSO rule, inferred with SBI given the seven measured connection probabilities and the corresponding prior distribution (gray). (b) Connection probabilities simulated with parameters sampled from the posterior (blue) and the prior (gray), compared to the measured connection probabilities (black, *Bruno and Sakmann, 2006*; *Constantinople and Bruno, 2013*). (c) Distribution of posterior ranks for every rule parameter, calculated with simulation-based calibration (orange), compared to the desired uniform distribution (gray area on the diagonal).
